1 **Regulation of inflammation and protection against invasive pneumococcal infection by**  
2 **the long pentraxin PTX3**

3

4 Rémi Porte<sup>1,2</sup>, Rita Silva-Gomes<sup>1,2</sup>, Charlotte Theroude<sup>3</sup>, Raffaella Parente<sup>1</sup>, Fatemeh Asgari<sup>1</sup>,  
5 Marina Sironi<sup>1</sup>, Fabio Pasqualini<sup>1</sup>, Sonia Valentino<sup>1</sup>, Rosanna Asselta<sup>1,2</sup>, Camilla Recordati<sup>4,5</sup>,  
6 Andrea Doni<sup>1</sup>, Antonio Inforzato<sup>1,2</sup>, Carlos Rodriguez-Gallego<sup>6</sup>, Ignacio Obando<sup>7</sup>, Elena  
7 Colino<sup>8</sup>, Barbara Bottazzi<sup>1</sup>, and Alberto Mantovani<sup>1,2,9</sup>

8

9 <sup>1</sup> IRCCS Humanitas Research Hospital, Rozzano, Milan, Italy

10 <sup>2</sup> Department of Biomedical Sciences, Humanitas University Milan, Italy

11 <sup>3</sup> Infectious Diseases Service, Department of Medicine, Lausanne University Hospital and  
12 University of Lausanne, Epalinges, Switzerland.

13 <sup>4</sup> Mouse and Animal Pathology Laboratory, Fondazione Filarete, Milan, Italy

14 <sup>5</sup> Department of Veterinary Medicine, University of Milan, Lodi, Italy

15 <sup>6</sup> Department of Clinical Sciences, University Fernando Pessoa Canarias, Las Palmas de Gran  
16 Canaria, Spain.

17 <sup>7</sup> Department of Pediatrics, Hospital Universitario Virgen del Rocío, Sevilla, Spain

18 <sup>8</sup> Department of Pediatrics, Complejo Hospitalario Universitario Insular\_Materno Infantil, Las  
19 Palmas de Gran Canaria, Spain

20 <sup>9</sup> William Harvey Research Institute, Queen Mary University of London, Charterhouse  
21 Square, London EC1M 6BQ, UK

22

23 **Running title:** PTX3 in invasive pneumococcal infection

24 **Keywords:** Pentraxin 3, *Streptococcus pneumoniae*, inflammation, polymorphonuclear  
25 neutrophils, P-selectin, endothelial cells

26 **Corresponding authors:**

27 [remi.porte@inserm.fr](mailto:remi.porte@inserm.fr) (RP)

28 [Barbara.Bottazzi@humanitasresearch.it](mailto:Barbara.Bottazzi@humanitasresearch.it) (BB)

29 [Alberto.Mantovani@humanitasresearch.it](mailto:Alberto.Mantovani@humanitasresearch.it) (AM)

30

## 31 **Abstract**

32 *Streptococcus pneumoniae* is a major pathogen in children, elderly subjects and  
33 immunodeficient patients. PTX3 is a fluid phase pattern recognition molecule (PRM)  
34 involved in resistance to selected microbial agents and in regulation of inflammation. The  
35 present study was designed to assess the role of PTX3 in invasive pneumococcal infection. In  
36 a murine model of invasive pneumococcal infection, PTX3 was strongly induced in non-  
37 hematopoietic (particularly, endothelial) cells. The IL-1 $\beta$ /MyD88 axis played a major role in  
38 regulation of the *Ptx3* gene expression. *Ptx3*<sup>-/-</sup> mice were more susceptible to invasive  
39 pneumococcal infection. Although high concentrations of PTX3 had opsonic activity *in vitro*,  
40 no evidence of PTX3-enhanced phagocytosis was obtained *in vivo*. In contrast, *Ptx3*-deficient  
41 mice showed enhanced recruitment of neutrophils and inflammation. Using P-selectin  
42 deficient mice, we found that protection against pneumococcus was dependent upon PTX3-  
43 mediated regulation of neutrophil inflammation. In humans, PTX3 genetic polymorphisms  
44 were associated with invasive pneumococcal infections. Thus, this fluid phase PRM plays an  
45 important role in tuning inflammation and resistance against invasive pneumococcal  
46 infection.

47

## 48 **Introduction**

49 *Streptococcus pneumoniae* (or pneumococcus) is a major leading cause of bacterial  
50 pneumonia, meningitis and sepsis in children, elders and immunodeficient patients. This  
51 pathogen is estimated to be responsible for most of the lower respiratory infections, causing  
52 around 1.18 million deaths annually worldwide (Troeger et al., 2018). Despite the widespread  
53 use of pneumococcal conjugate vaccines and antibiotic treatments, the combination of high  
54 carriage rate, ability to become pathogenic to the host, and genetic adaptability, make  
55 pneumococcus a significant cause of community- and hospital-acquired infections (Weiser et  
56 al., 2018). Since 2017, *S. pneumoniae* is classified as one of the 12 priority pathogens by  
57 World Health Organization.

58 *S. pneumoniae* is a Gram-positive extracellular opportunistic pathogen which  
59 colonizes the respiratory mucosa of the upper respiratory tract. Depending on the virulence  
60 factors expressed by the pathogen and host factors, the disease can evolve to pneumococcal  
61 invasive infection, where pneumococcus invades the lower respiratory tract and translocates  
62 through the blood stream into the systemic compartment (Weiser et al., 2018). The  
63 introduction over the years of pneumococcal vaccines able to protect against a variable and  
64 increasing number of different serotypes has been able to reduce the impact of the infection in  
65 susceptible populations (Tin Tin Htar et al., 2019; Troeger et al., 2018). However, for some  
66 serotypes available vaccines confer limited protection only. In particular, it has been reported  
67 that the 13-valent pneumococcal conjugate vaccine (Tin Tin Htar et al., 2019) fails to reduce  
68 the risk of infection by serotype 3, which associated with a complicated disease course and  
69 increased risk of death (Weinberger et al., 2010).

70 As a first line of defense against respiratory pathogens, innate immune Pattern  
71 Recognition Molecules (PRMs) recognize microbial components and modulate immune  
72 response to control infections. Among conserved fluid phase PRMs, Pentraxin 3 (PTX3), is a

73 member of the pentraxin family characterized by multifunctional properties, including  
74 regulation of innate immunity during infections (Garlanda et al., 2018). PTX3 is expressed by  
75 various hematopoietic and non-hematopoietic cells in response to microbial moieties and  
76 inflammatory cytokines (i.e IL-1 $\beta$  and TNF), and has been associated with the control of  
77 various infections by promoting different anti-microbial mechanisms. Indeed, PTX3  
78 participates directly to the elimination of selected microorganisms by promoting  
79 phagocytosis, activating the complement cascade and as a component of Neutrophil  
80 Extracellular Traps (NET) (Daigo et al., 2012; Jaillon et al., 2014, 2007; Moalli et al., 2010;  
81 Porte et al., 2019). Furthermore PTX3 modulates tissue remodeling (Doni et al., 2015) and  
82 inflammation by tuning complement activation and P-selectin-dependent transmigration  
83 (Deban et al., 2010; Lech et al., 2013), both involved in neutrophil recruitment and in the  
84 evolution of respiratory tract infections (Quinton and Mizgerd, 2015).

85 In humans, PTX3 plasma levels increase in the context of inflammation and selected  
86 infectious diseases, including pneumococcal pathologies (i.e community-acquired pneumonia,  
87 ventilator associated pneumonia, pneumococcal exacerbated chronic obstructive pulmonary  
88 disease), correlating with the severity of the disease and predicting the risk of mortality  
89 (Bilgin et al., 2018; Kao et al., 2013; Mauri et al., 2014; Porte et al., 2019; Saleh et al., 2019;  
90 Shi et al., 2020; Siljan et al., 2019; Thulborn et al., 2017). Single nucleotide polymorphisms  
91 (SNPs) in the *PTX3* gene have been associated with patient susceptibility to respiratory  
92 infections (Brunel et al., 2018; Chiarini et al., 2010; Cunha et al., 2015, 2014; He et al., 2018;  
93 Olesen et al., 2007; Wójtowicz et al., 2015).

94 The involvement of PTX3 in the control of selected respiratory pathogens and in the  
95 modulation of infection prompted us to investigate the role of this molecule in the control of  
96 pneumococcal infections. In a murine model of invasive pneumococcal infection, we  
97 observed that PTX3 genetic deficiency is associated with higher susceptibility to infection and

98 higher respiratory tract inflammation. We also observed that PTX3, mainly produced by  
99 stromal non-hematopoietic cells during pneumococcal infection, modulates neutrophil  
100 recruitment by dampening P-selectin dependent neutrophil migration. Hence, PTX3 plays a  
101 non-redundant role in the control of *S. pneumoniae* infection, modulating neutrophil  
102 associated respiratory tissue damage and pneumococcal systemic dissemination.

103

## 104 **Results**

### 105 **PTX3 expression during Pneumococcal invasive infection**

106 In order to define the relevance of PTX3 in pneumococcal respiratory disease, we first  
107 investigated whether the protein is induced during infection. Thus, we used a murine model of  
108 pneumococcal invasive infection induced by *S. pneumoniae* serotype 3. Mice were challenged  
109 intranasally with  $5 \times 10^4$  CFU and sacrificed at different time points. As already described,  
110 *S. pneumoniae* serotype 3 causes bacterial colonization of the respiratory tract, then  
111 disseminates through the blood circulation and infects other organs like the spleen, resulting  
112 in death within 3 to 4 days (Figure S1A-B) (de Porto et al., 2019). As early as 6h post-  
113 infection, we detected a local expression of PTX3 in the alveolar compartment near the  
114 pulmonary veins (Figure 1A-B). At 12h post-infection, we were able to detect the PTX3  
115 specific staining by the endothelial cells in the area where we can appreciate inflammatory  
116 cells infiltration. This association was confirmed 24h post-infection, when a strong PTX3  
117 staining was present near the recruitment site of inflammatory cells forming inflammatory  
118 foci (Figure 1A). The kinetic of PTX3 production was confirmed by the quantification of  
119 PTX3<sup>+</sup> area (Figure 1B) and by analysis of mRNA in the lung (Figure S1C). Interestingly,  
120 local and systemic production of PTX3 was strongly induced by the infection during the  
121 disseminating phase (Figure 1C). During this invasive infection we observed that *Ptx3* was

122 upregulated mainly in the lung, aorta and heart, while other organs like brain, kidneys and  
123 liver did not show higher *Ptx3* expression compared to the uninfected mice (Figure S1D).

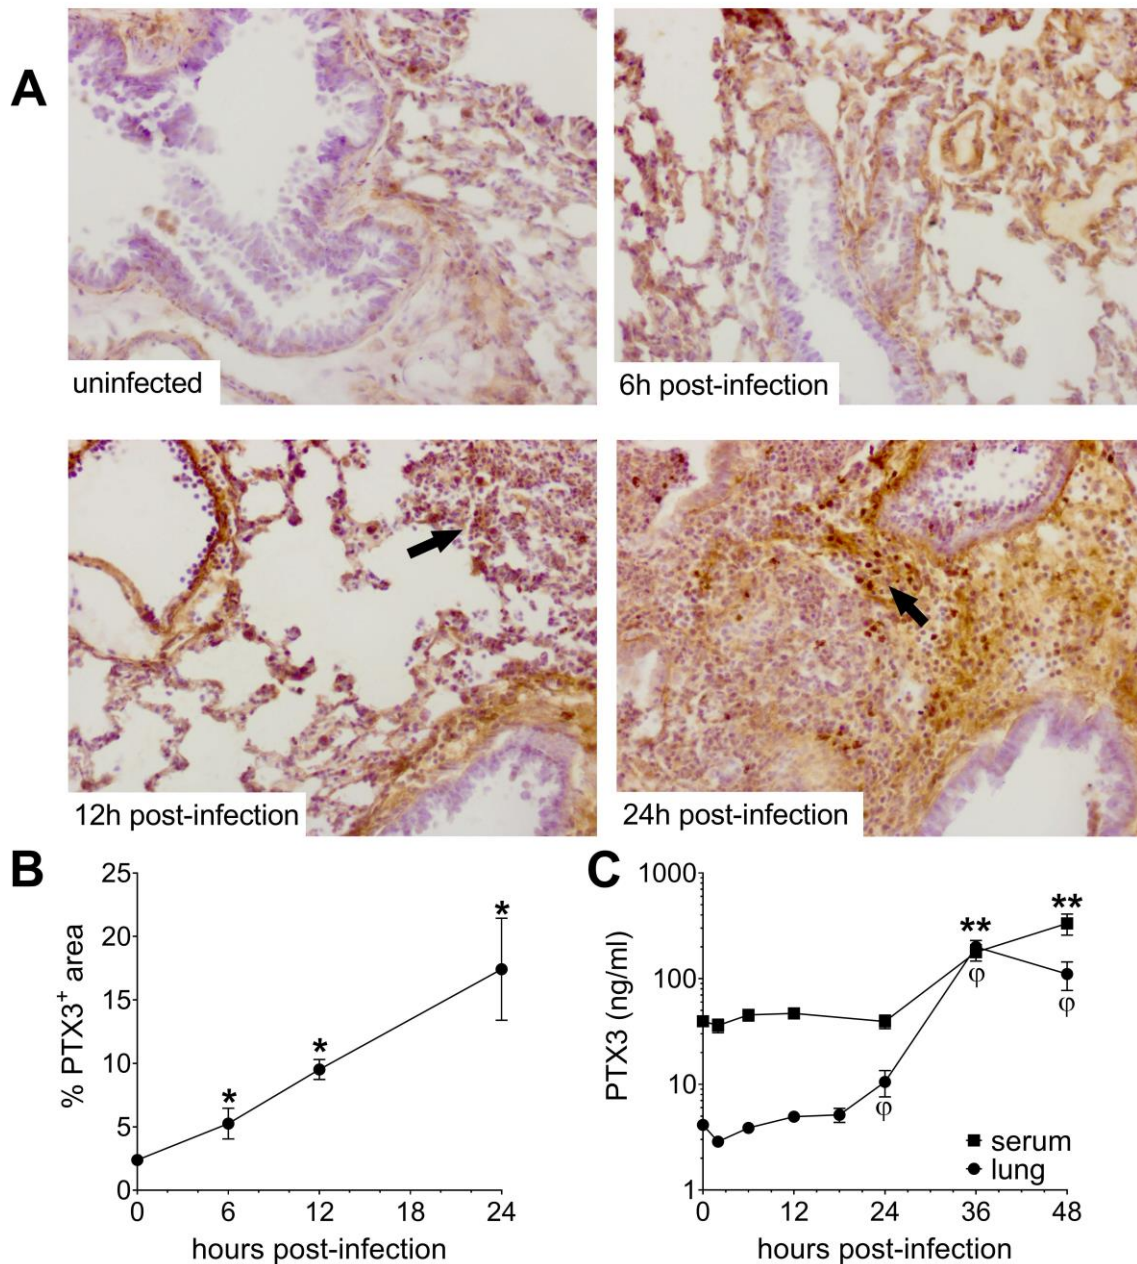

124

125 **Figure 1. Invasive pneumococcal infection induces PTX3 expression.**

126 WT mice were infected intranasally with  $5 \times 10^4$  CFU of *S. pneumoniae* serotype 3 and  
127 sacrificed at the indicated time points for tissue collection. (A-B) Immunohistochemical  
128 analysis and quantification of PTX3 expression in lung sections (magnification x10) from  
129 uninfected mice and mice sacrificed 6h, 12h and 24h post-infection (n=3-6). (A) One



130 representative images of at least three biological replicates for each condition is reported.  
131 Inflammatory cell infiltrates are indicated by arrows. (B) Sections were scanned and analyzed  
132 to determine the percentage of PTX3<sup>+</sup> area at the indicated time points. (C) PTX3 protein  
133 levels determined by ELISA in serum and lung homogenates collected at the indicated time  
134 points (n=4-10). Results are reported as mean ± SEM. Statistical significance was determined  
135 using the Mann-Whitney test comparing results to uninfected mice ( $\varphi$  or \* $P$ <0.05 and  
136 \*\* $P$ <0.01).

137

### 138 **Induction of PTX3 by IL-1 $\beta$ during *S. pneumoniae* infection**

139 PTX3 has been described to be induced by primary inflammatory cytokines in  
140 particular IL-1 $\beta$  (Garlanda et al., 2018; Porte et al., 2019). In this pneumococcal invasive  
141 infection model we observed a rapid induction of IL-1  $\beta$  (Figure 2A), and a strong correlation  
142 between the levels of IL-1 $\beta$  expressed in the respiratory tract with the levels of lung PTX3  
143 (Figure 2B). Moreover, *Il1r*<sup>-/-</sup> mice infected by *S. pneumoniae* showed lower PTX3 levels,  
144 locally and systemically (i.e in the lung and the serum respectively) (Figure 2C-D).  
145 *S. pneumoniae* infected *Myd88*<sup>-/-</sup> mice were not able to produce PTX3 in the lung and  
146 presented the same impairment of PTX3 production as *Il1r*<sup>-/-</sup> mice (Figure 2C-D). These data  
147 suggest that IL-1 $\beta$  is a major driver of PTX3 during pneumococcal infection.

148



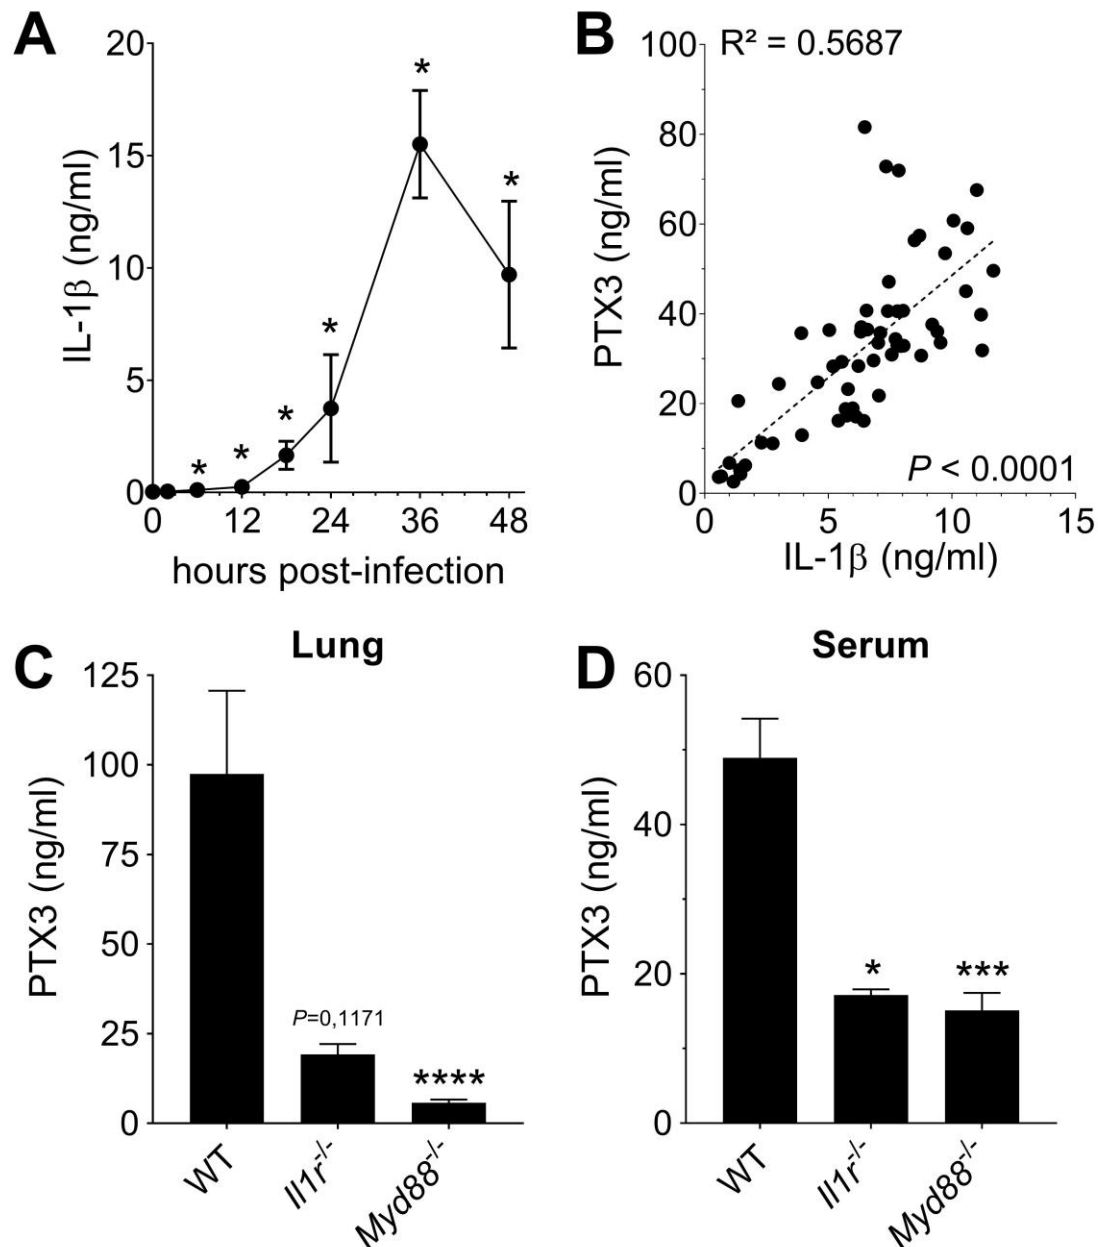

149

150 **Figure 2. Role of IL-1 $\beta$  in induction of PTX3 during *S. pneumoniae* infection.**

151 WT mice were infected intranasally with  $5 \times 10^4$  CFU of *S. pneumoniae* serotype 3 and

152 sacrificed at the indicated time points for tissue collection. (A) IL-1 $\beta$  protein levels in lung

153 homogenates collected at the indicated time points determined by ELISA (n=3-4). (B)

154 Correlation between PTX3 and IL-1 $\beta$  protein levels in lung homogenates of all infected mice

155 sacrificed from 2h to 48h post-infection (data pooled from 5 independent experiments, n=60).

156 PTX3 protein levels determined by ELISA in lung homogenates (C) and serum (D) collected

157 36h post-infection in WT, *Il1r*<sup>-/-</sup> and *Myd88*<sup>-/-</sup> mice (n=7-8). Results are reported as mean  $\pm$

158 SEM. Statistical significance was determined using the Mann-Whitney test comparing results  
159 to uninfected mice (A-B) or the non-parametric Kruskal-Wallis test with post-hoc corrected  
160 Dunn's test comparing means to WT infected mice (C-D) (\* $P < 0.05$ , \*\*\* $P < 0.001$  and  
161 \*\*\*\* $P < 0.0001$ ).

162

### 163 **Non-hematopoietic cells are a major source of PTX3 during pneumococcal infection**

164 It has been previously reported that neutrophils contain preformed PTX3, representing  
165 an important source of the protein, rapidly released in response to proinflammatory cytokines  
166 or microbial recognition (Jaillon et al., 2007). In agreement, we observed that human  
167 neutrophils can release PTX3 upon stimulation with *S. pneumoniae* (Figure S2A). To  
168 investigate the involvement of neutrophils in the production of PTX3 in our model, we used  
169 mice lacking granulocyte colony-stimulating factor receptor (*Csf3r*<sup>-/-</sup>). These mice are  
170 characterized by chronic neutropenia, granulocyte and macrophage progenitor cell deficiency  
171 and impaired neutrophil mobilization (Liu et al., 1996; Ponzetta et al., 2019). Following  
172 pneumococcal infection, *Csf3r*<sup>-/-</sup> mice presented lower levels of myeloperoxidase (MPO), a  
173 marker of neutrophil recruitment, in lung homogenates at 36h post-infection (Figure S2B). By  
174 contrast, even though these mice presented a lower amount of neutrophils recruited in  
175 response to the infection, they expressed the same pulmonary levels of PTX3 as WT mice  
176 (Figure S2B). These results suggest that neutrophils are not the main source of PTX3 in our  
177 murine model of pneumococcal invasive infection.

178 Since PTX3 can be produced by hematopoietic and non-hematopoietic cells, bone  
179 marrow chimeras were used to evaluate the cellular compartment responsible for PTX3  
180 production. During pneumococcal infection, we did not observe any difference in the levels of  
181 PTX3 in the respiratory tract and in the serum of WT mice receiving bone marrow from *Ptx3*<sup>-/-</sup>  
182 <sup>-/-</sup> or WT animals, while no PTX3 was measured in *Ptx3*<sup>-/-</sup> mice receiving WT or *Ptx3*<sup>-/-</sup> bone

183 marrow (Figure 3A-B). These results suggest that PTX3 is mainly produced by the non-  
184 hematopoietic compartment after pneumococcal infection. Endothelial cells were described as  
185 an important source of PTX3 (Garlanda et al., 2018), thus we evaluated their contribution to  
186 PTX3 production during pneumococcal infection. To this aim we crossed conditional *Ptx3*  
187 deficient mice (*Ptx3LoxP<sup>+/+</sup>*) with *Cdh5-Cre* mice to generate animals with the deletion of  
188 PTX3 in endothelial cells. When *Ptx3LoxP<sup>+/+</sup>/Cdh5Cre<sup>+/+</sup>* mice were infected with  
189 *S. pneumoniae*, they presented approximately 50% reduction of PTX3 levels compared to  
190 PTX3-competent mice (Figure 3C-D). *In-vitro* experiments confirmed the ability of both  
191 murine and human endothelial cells to produce PTX3 after stimulation with *S. pneumoniae*  
192 (Figure S2C). Thus, in our setting, non-hematopoietic cells, mainly endothelial cells, are a  
193 major source of PTX3.

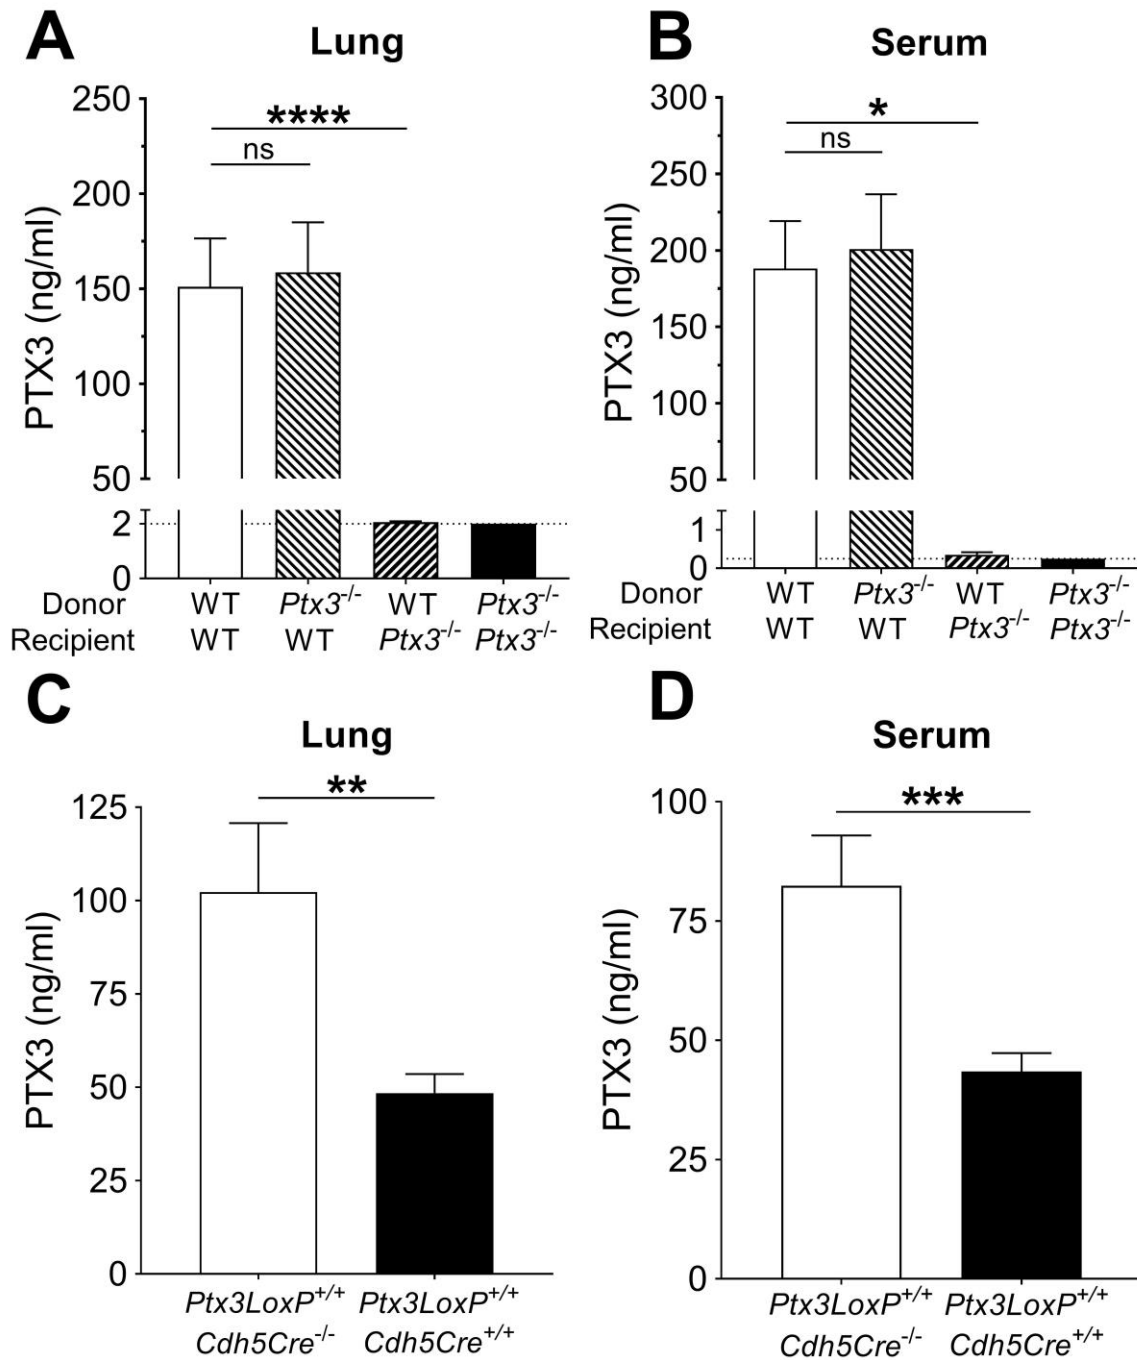

194

195 **Figure 3. Non-hematopoietic cells are a major source of PTX3 during pneumococcal**  
196 **infection.**

197 Mice were infected intranasally with  $5 \times 10^4$  CFU of *S. pneumoniae* serotype 3 and sacrificed  
198 at 36h post-infection for tissue collection. (A-B) PTX3 protein levels determined by ELISA in  
199 lung homogenates (n=12-14, A) and serum (n=6, B) from chimeric mice. The experiment was

200 repeated a second time with similar results. (C-D) PTX3 protein levels determined by ELISA  
201 in lung homogenates (C) and serum (D) collected from *Ptx3LoxP<sup>+/+</sup>Cdh5-cre<sup>-/-</sup>*,  
202 *Ptx3LoxP<sup>+/+</sup>Cdh5-cre<sup>+/+</sup>* (n=10-13). Results are reported as mean  $\pm$  SEM; PTX3 detection  
203 limit is 2 ng/ml in lung homogenates (A) and 0.25 ng/ml in serum (B) and is represented by a  
204 dotted line. Statistical significance was determined using the non-parametric Kruskal-Wallis  
205 test with post-hoc corrected Dunn's test comparing means to the WT recipient mice  
206 reconstituted with WT bone marrow (A-B) or the Mann-Whitney test (C-D) (\* $P$ <0.05,  
207 \*\* $P$ <0.01, \*\*\* $P$ <0.001 and \*\*\*\*  $P$ <0.0001).

208

### 209 **Non-redundant role of PTX3 in resistance to pneumococcal infection.**

210 Next we evaluated the role of PTX3 in resistance against pneumococcus. When *Ptx3<sup>-/-</sup>*  
211 mice were infected with *S. pneumoniae* ( $5 \times 10^4$  CFU), a significant increase of the bacterial  
212 load in the lung was observed during the invasive phase of infection (i.e. 36h post-infection),  
213 compared to WT mice (Figure 4A). Defective local control of bacterial growth was associated  
214 to an increase of bacterial load in the systemic compartment (Figure 4B). Interestingly there  
215 was no difference at earlier time points (i.e. 18h post-infection, Figure S3A), suggesting that  
216 PTX3 exerted a role in the control of pneumococcal infection mainly during the invasive  
217 phase. Using a bacterial dose ( $5 \times 10^3$  CFU) inducing around 30% mortality in WT animals,  
218 *Ptx3<sup>-/-</sup>* mice showed a significant higher mortality (83.3%;  $P$ <0.001) (Figure 4C). The  
219 phenotype described so far is not restricted to serotype 3 pneumococcus. In fact, when mice  
220 were infected with *S. pneumoniae* serotype 1, we observed a strong PTX3 production during  
221 the invasive phase of the infection (Figure S3B) and a correlation with IL-1 $\beta$  levels (Figure  
222 S3C). *Ptx3<sup>-/-</sup>* mice infected by serotype 1 presented a higher sensitivity to the infection  
223 compared to WT animals, with a higher number of bacteria at the local site of infection and  
224 also in the systemic compartment 24h post-infection (Figure S3D-E). Thus, in the applied

225 model of *S. pneumoniae* infection, the protection conferred by PTX3 is not limited to serotype  
226 3, and embraces other bacterial serotypes of clinical relevance, including serotype 1.

227 Systemic administration of recombinant PTX3 to *Ptx3*<sup>-/-</sup> mice rescues the phenotype.  
228 As reported in Figure 4D, PTX3 administration in *Ptx3*<sup>-/-</sup> mice reduced lung colonization to  
229 the same level observed in WT mice. We then evaluated the antibacterial activity of PTX3 on  
230 *S. pneumoniae* serotype 3. WT animals were treated locally with 1 μg of recombinant protein  
231 before infection or 12h post-infection. Under both conditions we observed a significant  
232 reduction (44% and 57% respectively; *P*<0.01) of the pulmonary bacterial load compared  
233 with the CFU found in mice treated with vehicle alone (Figure 4E).

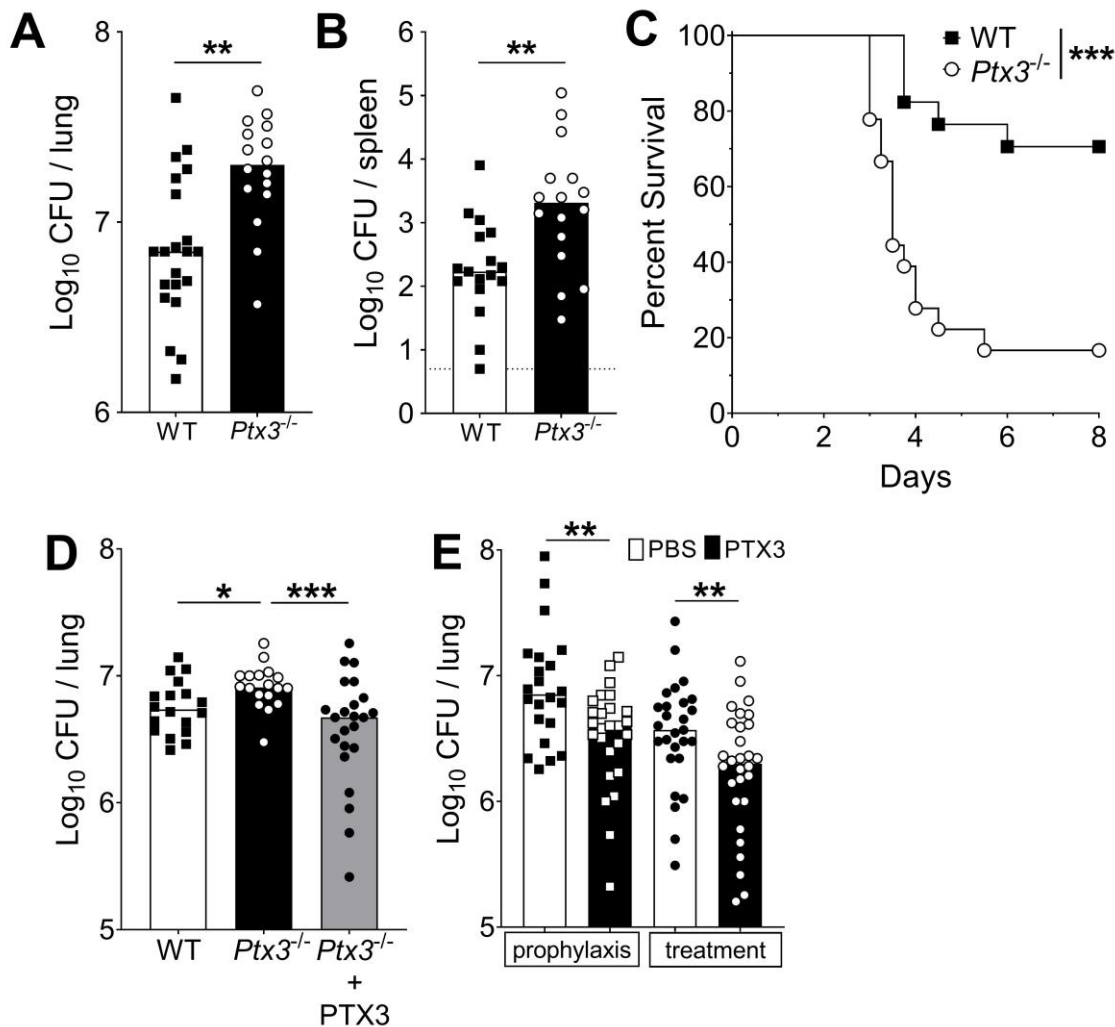

234

235 **Figure 4. Defective resistance of PTX3-deficient mice to invasive pneumococcal**  
236 **infection.**

237 Mice were infected intranasally with different doses of *S. pneumoniae* serotype 3 and  
238 sacrificed at the indicated time points for tissue collection. (A-B) WT and *Ptx3*<sup>-/-</sup> mice were  
239 infected with 5x10<sup>4</sup> CFU and bacterial load in lung (A) and spleen (B) was analyzed at 36h  
240 post-infection (data pooled from 2 independent experiments, n=16-21). (C) Survival of WT  
241 and *Ptx3*<sup>-/-</sup> mice (data pooled from 2 independent experiments, n=18) was monitored every 6h  
242 after infection with 5x10<sup>3</sup> CFU. (D) Bacterial load was analyzed in lungs collected 36h post-  
243 infection from WT, *Ptx3*<sup>-/-</sup> and *Ptx3*<sup>-/-</sup> mice treated intraperitoneally with recombinant PTX3  
244 (10µg/100µl) before the infection and 24h post-infection (n=18-23). (E) Bacterial load in  
245 lungs collected 36h post-infection from WT mice treated intranasally before the infection  
246 (prophylaxis, data pooled from 2 independent experiments, n=22-26) or 12h post-infection  
247 (treatment, data pooled from 3 independent experiments, n=37-40) with 1µg/30µl of  
248 recombinant PTX3 or PBS. Results are reported as median. CFU detection limits in the spleen  
249 is 5 CFU represented by a dotted line. Statistical significance was determined using the  
250 Mann-Whitney test (A-B, E), the non-parametric Kruskal-Wallis test with post-hoc corrected  
251 Dunn's test comparing means to the WT mice (D) and Log-rank (Mantel-Cox) test for  
252 survival (\**P*<0.05, \*\**P*<0.01 and \*\*\**P*<0.001).

253

254 **Lack of effective opsonic activity of PTX3**

255 In an effort to explore the mechanism responsible for PTX3-mediated resistance, we  
256 first assessed the effect of the recombinant protein on the *in-vitro* growth of *S. pneumoniae*.  
257 The incubation of *S. pneumoniae* with 25-250 µg/ml of recombinant PTX3 did not have any  
258 effect on the growth rate of the bacteria (Figure S4).



259 PTX3 has the capability to act as an opsonin binding selected pathogens and  
260 increasing their removal by phagocytosis (Garlanda et al., 2002; Jaillon et al., 2014; Moalli et  
261 al., 2010). To assess whether the control of the pneumococcal infection by PTX3 was due to  
262 opsonic activity, we first analyzed PTX3 binding to *S. pneumoniae*. By using a flow  
263 cytometry assay, we analyzed PTX3 binding to *S. pneumoniae* serotype 3 mimicking the  
264 bacteria/PTX3 ratio found in the infected lung ( $10^6$  CFU/100 ng PTX3). Under these  
265 conditions, we did not observe any interaction of PTX3 with bacteria and, even with an  
266 amount of PTX3 5- to 10-fold higher than the one produced in the entire lung, less than 1% of  
267 the bacteria were bound (Figure 5A). At 500  $\mu$ g/ml of PTX3 (5000-fold higher than in the  
268 lung homogenates) we observed binding to only 36.4% of bacteria (Figure 5A).

269 We then assessed phagocytosis *in vitro* and *in vivo* using GFP-expressing  
270 *S. pneumoniae* serotype 1 (*S. pneumoniae*-GFP). In a first set of experiments, human  
271 neutrophils were incubated with PTX3-opsonized *S. pneumoniae*-GFP. We confirmed that  
272 PTX3 exerts opsonic effects, increasing the phagocytosis of pneumococcus by neutrophils,  
273 but only at very high concentrations, i.e. higher than 100  $\mu$ g/ml (Figure 5B). We then moved  
274 to an *in vivo* setting. Since the instillation of as low as 1 $\mu$ g of PTX3 was sufficient to induce  
275 an antibacterial effect when administrated locally just before the infection (Figure 4E), we  
276 incubated  $5 \times 10^4$  CFU of *S. pneumoniae* serotype 3 (i.e. the inoculum normally used for a  
277 lethal infection in our model) with 33.3  $\mu$ g/ml of recombinant PTX3. Mice infected with  
278 PTX3-opsonized *S. pneumoniae* serotype 3 showed the same local bacterial burden at 6h to  
279 36h after infection as mice infected with pneumococcus incubated with PBS (Figure 5C). We  
280 then evaluated the phagocytic ability of neutrophils recruited *in-vivo* during the infection  
281 comparing WT and *Ptx3* deficient mice. Interestingly, we did not observe any difference in  
282 the percentage of neutrophils phagocytizing *S. pneumoniae*-GFP in the BAL or in the lung  
283 (Figure 5D). Finally, we assessed the killing ability of neutrophils collected from WT and

284 *Ptx3* deficient mice. We did not observe any difference in the percentage of *S. pneumoniae*  
285 serotype 3 killed by purified murine neutrophils neither after 1 hour of incubation  
286 (WT:  $79.02 \pm 2.87$  and *Ptx3*<sup>-/-</sup>:  $80.48 \pm 2.87$ ,  $P=0.15$ ) or 3 hours of incubation when nearly all  
287 pneumococcus were efficiently killed (WT:  $99.46 \pm 0.30$  and *Ptx3*<sup>-/-</sup>:  $96.55 \pm 5.40$ ,  $P=0.31$ )  
288 (Figure 5E). These results suggest that the role of PTX3 in resistance to invasive  
289 pneumococcus infection is not accounted for by its opsonic activity.

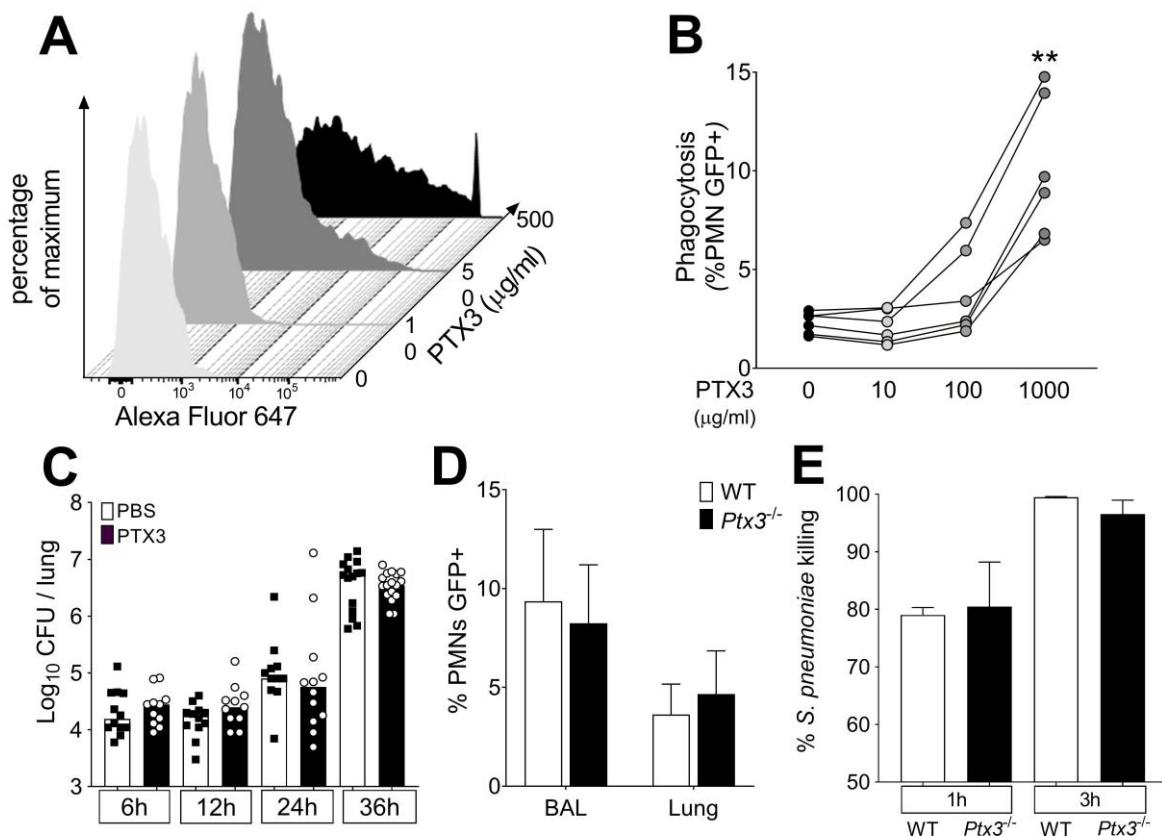

290

291 **Figure 5. Role of phagocytosis in PTX3-mediated resistance to *S. pneumoniae***

292 (A) Binding of recombinant PTX3-biot at the indicated concentration with  $10^6$  CFU of  
293 *S. pneumoniae* serotype 3. PTX3 binding to *S. pneumoniae* was analyzed by flow cytometry  
294 after incubation with Streptavidin-Alexa Fluor 647. (B) *S. pneumoniae* serotype 1 expressing  
295 GFP ( $10^6$  CFU) was pre-opsonized with indicated concentration of recombinant PTX3 and  
296 incubated 30 min with  $10^5$  purified human neutrophils from 6 independent donors. GFP

297 positive neutrophils were analyzed by flow cytometry. (C) Bacterial load in lung collected at  
298 indicated time points from WT mice infected intranasally with *S. pneumoniae* serotype 3 pre-  
299 opsonized with 33µg/ml of recombinant PTX3 or non-opsonized. (data pooled from 2  
300 independent experiments, n=11-17). (D) Neutrophil phagocytosis of *S. pneumoniae* serotype  
301 1 expressing GFP was analyze by flow cytometry. BAL and lungs from WT and *Ptx3*<sup>-/-</sup> mice  
302 were collected 24h after infection with a lethal inoculum of *S. pneumoniae* (data pooled from  
303 2 independent experiments, n=9-14). (E) alamarBlue based killing assay performed with  
304 Neutrophils purified from WT and *Ptx3*<sup>-/-</sup> mice assessed after 1h and 3h incubation at a MOI  
305 *S. pneumoniae*/Neutrophils 2/1. Results are expressed as mean of 5 technical replicate for  
306 each time point and donor (B), median (C) and mean ± SD (D-E). Statistical significance was  
307 determined using a one-way ANOVA with Sidak's multiple comparison test (B), the non-  
308 parametric Kruskal-Wallis test with post-hoc corrected Dunn's test comparing means to the  
309 WT mice of each time point (C, E) and the Mann-Whitney test (D) (\*\**P*<0.01).

310

### 311 **Regulation of inflammation by PTX3**

312 In pneumococcal invasive disease induced by *S. pneumoniae* serotype 3, infection was  
313 characterized by a multifocal neutrophilic bronchopneumonia (Figure S5A). The main  
314 inflammatory cell recruitment was observed during the invasive phase of the infection  
315 (starting from 24h after infection), when the pulmonary MPO was dramatically increased,  
316 (Figure S5B). We analyzed more accurately neutrophil recruitment in the lung and in the  
317 BAL of infected mice and we observed two phases of neutrophil recruitment. An initial  
318 recruitment, characterized by an increased (i.e. 3-fold compared to uninfected lung) number  
319 of neutrophils both in the BAL and in the lung parenchyma, was observed during the first 6h  
320 of infection. In the next 12h to 24h of infection we observed an important recruitment of  
321 neutrophils in the lung (i.e. 4-fold compared to uninfected lung) that translocated into the

322 alveolar space (up to 50-fold compared to uninfected BAL) (Figure S5C-D). These two steps  
323 of recruitment have been described to exert opposite roles (Bou Ghanem et al., 2015). Indeed,  
324 the first phase is important for the early control of the infection, reducing the number of  
325 colonizing bacteria. In contrast the second phase has been associated with the development of  
326 the inflammatory environment, leading to tissue damage that could promote growth and  
327 invasion of the bacteria (Bou Ghanem et al., 2015). Given the mild expression of PTX3  
328 during the first hours (Figure 1A), we investigated the second phase of neutrophil recruitment,  
329 comparing *Ptx3* deficient and WT mice 18h after infection. At this time point *Ptx3* deficiency  
330 was not associated with a higher respiratory bacterial load (Figure S3A). Interestingly, the  
331 inflammatory profile was significantly increased in *Ptx3*<sup>-/-</sup> mice, as shown by an increased  
332 development of foci in the lung induced by a higher inflammatory cell recruitment (Figure  
333 6A-C). Moreover, looking at the time course of the development of pneumococcal-induced  
334 respiratory inflammation, we observed that *Ptx3*<sup>-/-</sup> mice had a quicker and more severe  
335 formation of inflammatory foci compared to the WT (Figure 6B-C). Furthermore, these mice  
336 presented also an increased vascular damage score based on higher perivascular edema and  
337 hemorrhages (Figure S5E). Flow cytometry analysis revealed that the higher inflammation in  
338 *Ptx3* deficient mice was due to a significant increase of neutrophil recruitment in the BAL and  
339 the lung (Figure 6D). Moreover, we did not observe any change in the recruitment of other  
340 myeloid cells, i.e. macrophages, eosinophils and monocytes. This phenotype was also  
341 observed with the serotype 1 model of invasive pneumococcal infection (Figure S5F).

342 Finally, we observed that intranasal treatment with recombinant PTX3 was also  
343 associated with a decrease in the neutrophil number in BAL and lungs, demonstrating that  
344 PTX3 has a direct role in the control of neutrophil migration in the respiratory tract (Figure  
345 6E).

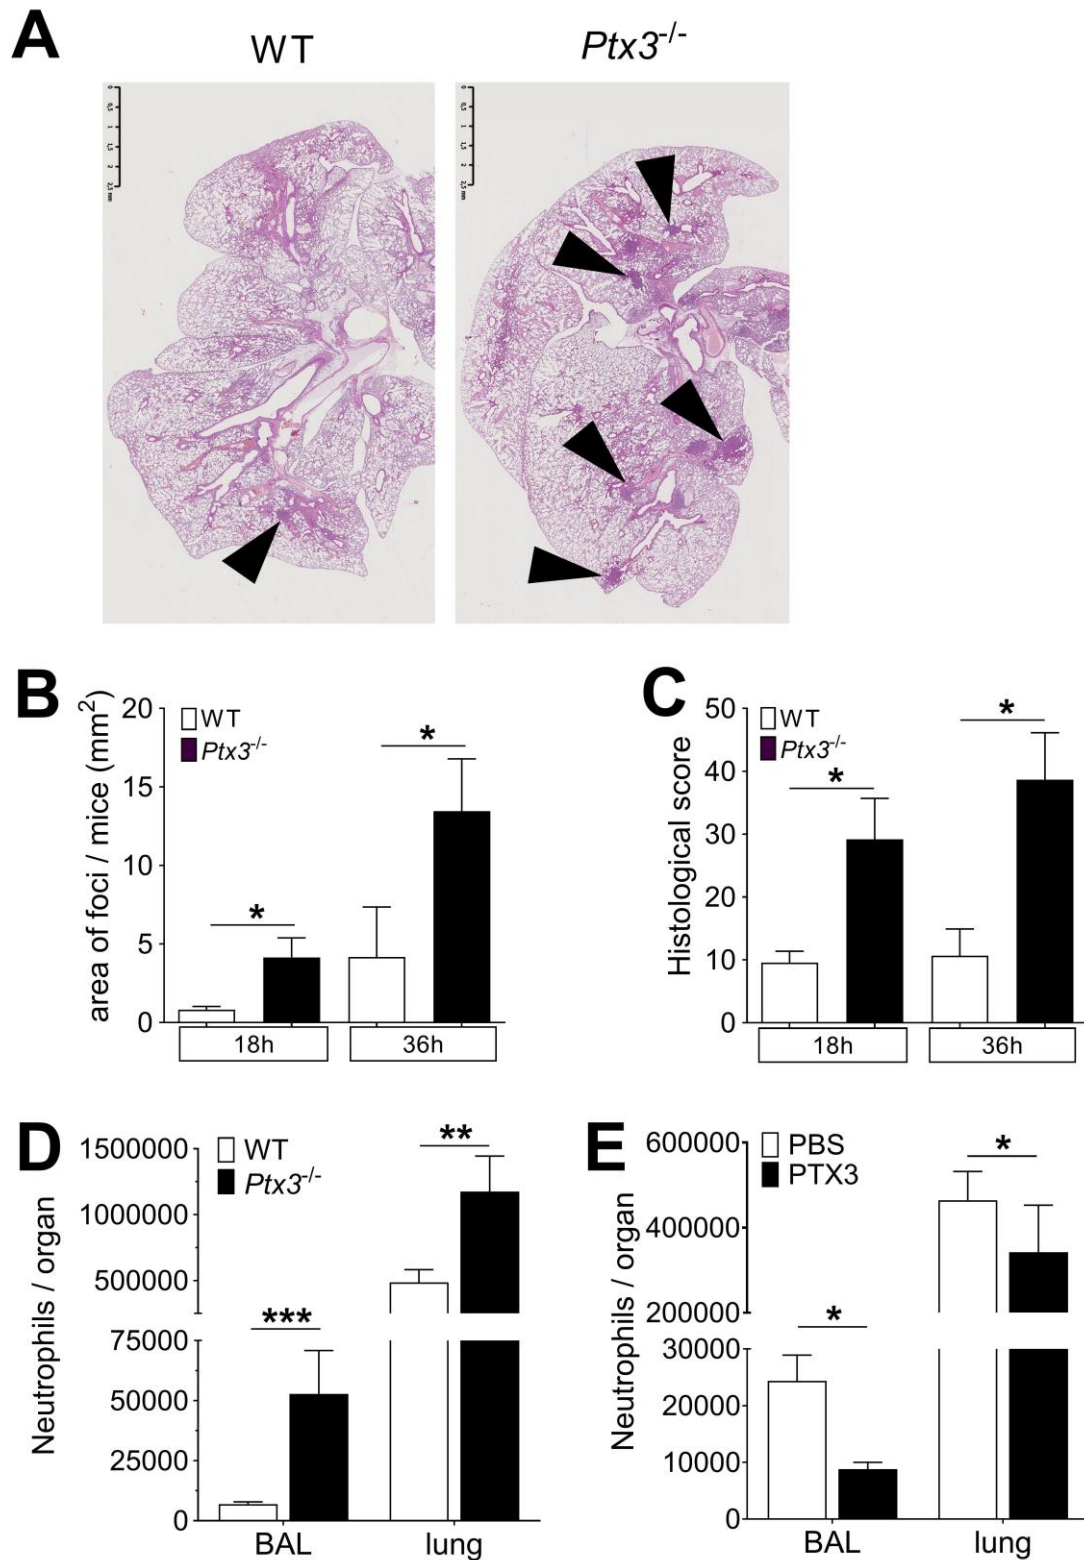

346

347 **Figure 6. PTX3 regulates inflammation during pneumococcus infection.**

348 Mice were infected intranasally with  $5 \times 10^4$  CFU of *S. pneumoniae* serotype 3 and sacrificed

349 at the indicated time points for tissue collection. (A) Hematoxylin and Eosin (H&E) staining

350 of formalin-fixed histological sections from the lungs of WT and *Ptx3*<sup>-/-</sup> mice at 4x  
351 magnification. One representative image from at least six biological replicates of WT and  
352 *Ptx3*<sup>-/-</sup> mice. Inflammatory cell foci are indicated by arrows. (B) Area of inflammatory cells  
353 foci measured in lungs collected 18h and 36h post-infection from WT and *Ptx3*<sup>-/-</sup> mice. Areas  
354 were measured on three H&E stained lung sections per mice at different depth separated by at  
355 least 100µm each (n=6-10). (C) Inflammatory histological score measured in lungs collected  
356 18h and 36h post-infection from WT and *Ptx3*<sup>-/-</sup> mice. Scores (detailed in the Material and  
357 Methods section) were determined on three H&E stained lung sections per mice at different  
358 depth separated by at least 100µm each (n=6-10). (D) Neutrophil number determined by flow  
359 cytometry in BAL and lungs collected 18h post-infection from WT and *Ptx3*<sup>-/-</sup> mice (data  
360 pooled from 2 independent experiments, n=11-18). (E) Neutrophil number determined by  
361 flow cytometry in the BAL and lung collected 18h post-infection from WT mice treated  
362 intranasally 12h post-infection with recombinant PTX3 or PBS (data pooled from 2  
363 independent experiments, n=11-18). Results represent the mean ± SEM. Statistical  
364 significance was determined using the Mann-Whitney test comparing results to uninfected  
365 mice (\**P*<0.05, and \*\*\**P*<0.001).

366

### 367 **Regulation of neutrophil recruitment by PTX3 during pneumococcal invasive infection.**

368 It has been shown that neutrophil depletion during the invasive phase resulted in  
369 protection against pneumococcal infection (Bou Ghanem et al., 2015). Accordingly,  
370 neutrophil depletion by anti-Ly6G was used to assess the role of these cells in PTX3-mediated  
371 protection against pneumococcal infection. In WT mice infected intranasally with *S.*  
372 *pneumoniae*, treatment with anti-Ly6G significantly reduced neutrophils infiltration in the  
373 lungs (Figure S6A). In addition, treatment with anti-Ly6G completely abolished the increased  
374 accumulation of neutrophils observed in *Ptx3*<sup>-/-</sup> mice (Figure S6A-B). The reduction of



375 neutrophil recruitment in both WT and *Ptx3*<sup>-/-</sup> mice treated with anti-Ly6G resulted in a  
376 significant reduction of the local and systemic bacterial load, compared to mice treated with  
377 the isotype control (Figure 7A-B). In addition, *Ptx3*<sup>-/-</sup> mice treated with neutrophil depleting  
378 antibody were not more infected than the WT mice (Figure 7A-B). These results suggest that  
379 taming of pneumococcus-promoting neutrophil recruitment underlies the role of PTX3 in  
380 resistance against this bacterial pathogen.

381 To dissect the mechanism by which PTX3 orchestrates the modulation of  
382 inflammation during pneumococcal infection, we first evaluated the level of neutrophil  
383 chemoattractants. At 18h post-infection, even though there was a higher amount of  
384 neutrophils in the airways of *Ptx3*<sup>-/-</sup> mice, we did not detect any differences in the levels of  
385 CXCL1 and CXCL2 between *Ptx3* deficient and WT mice (Figure S6C). Since PTX3 is a  
386 well-known regulator of complement activation (Haapasalo and Meri, 2019), we investigated  
387 the levels of the two anaphylatoxins C3a and C5a in the lung homogenates of infected mice.  
388 No difference in the levels of the potent chemoattractants C3a and C5a, was observed (Figure  
389 S6C). The levels of C3d, a C3 degradation product deposited on the surface of cells and a  
390 marker of complement activation in lung homogenates was similar in *Ptx3* deficient and WT  
391 mice (Figure S6D).

392 PTX3 has been described to directly regulate inflammation by binding P-selectin and  
393 reducing neutrophil recruitment, dampening rolling on endothelium (Deban et al., 2010; Lech  
394 et al., 2013). We first excluded the presence of any difference in P-selectin levels both in WT  
395 and *Ptx3* deficient mice, uninfected or infected with pneumococcus (Figure S6E). Therefore,  
396 we investigated whether interaction with P-selectin could be relevant in the regulation of  
397 neutrophil recruitment into the lung. We investigated the ability of PTX3 to dampen  
398 neutrophil transmigration through endothelial cell layer *in vitro*, using *S. pneumoniae* as the  
399 attractive signal. We observed that PTX3 could block 40% of the neutrophil migration



400 induced by *S. pneumoniae* (Figure 7C). Moreover, treatment of endothelial cells with anti-  
401 CD62P (P-selectin) antibody induced the same blocking effect. We did not observe any  
402 additional blocking effect of PTX3 in association with anti-CD62P, suggesting that PTX3  
403 exerts its blocking effect through P-selectin. To confirm that PTX3 protects infected mice by  
404 blocking P-selectin, we used P-selectin deficient mice (*Selp*<sup>-/-</sup>). In *Selp*<sup>-/-</sup> mice PTX3 treatment  
405 did not reduce the bacterial load (Figure 7D). Moreover, we treated WT and *Ptx3* deficient  
406 mice with anti-CD62P, to block P-selectin-dependent neutrophil transmigration during the  
407 invasive phase of infection. Anti-CD62P treatment completely abolished the higher  
408 neutrophils recruitment in *Ptx3* deficient mice (Figure S6F-G). This result suggests that the  
409 higher neutrophil infiltration observed during pneumococcal pneumonia in the absence of  
410 PTX3 is dependent on P-selectin. Importantly, the reduction of neutrophil recruitment in *Ptx3*  
411 deficient mice treated with anti-CD62P is associated with a significant reduction of the local  
412 and systemic bacterial load reaching the same level observed in WT mice treated with anti-  
413 CD62P (Figure 7E-F).

414 Finally, to assess the role of the P-selectin pathway in PTX3-mediated resistance  
415 against invasive pneumococcus infection, we took advantage of *Ptx3*<sup>-/-</sup>*Selp*<sup>-/-</sup> double deficient  
416 mice. As shown in Figure 7G-H, genetic deficiency in P-selectin and PTX3 completely  
417 rescued the phenotype observed in *Ptx3*<sup>-/-</sup> mice. Thus, the defective control of invasive  
418 pneumococcal infection observed in *Ptx3*<sup>-/-</sup> mice is due to unleashing P-selectin-dependent  
419 recruitment of pneumococcus-promoting neutrophils.

420



430 transmigrated neutrophils in the control condition (i.e. *S. pneumoniae* in the lower chamber  
431 and no treatment in the upper chamber). (D) Bacterial load in lungs collected 36h post-  
432 infection from WT and *Selp*<sup>-/-</sup> mice treated intranasally 12h post-infection with 1µg/30µl of  
433 recombinant PTX3 or PBS (data pooled from 2 independent experiments, n=10-11). (E-  
434 F) Bacterial load in lungs (E) and spleens (F) collected 36h post-infection from WT and *Ptx3*<sup>-/-</sup>  
435 <sup>-/-</sup> mice treated intravenously 12h post-infection with 50µg/100µl of anti-CD62P or isotype  
436 control antibodies (data pooled from 2 independent experiments, n=12-13). (G-H) Bacterial  
437 load in lungs (G) and spleens (H) collected 36h post-infection from WT, *Ptx3*<sup>-/-</sup>, *Selp*<sup>-/-</sup> and  
438 *Ptx3*<sup>-/-</sup>*Selp*<sup>-/-</sup> mice (data pooled from 2 independent experiments, n=8-12). Results are reported  
439 as median (A-B, D-H) and mean ± SEM. CFU detection limits in the spleen is 5 CFU  
440 represented by a dotted line. Statistical significance was determined using the non-parametric  
441 Kruskal-Wallis test with post-hoc corrected Dunn's test comparing every means (A-H)  
442 (\**P*<0.05, \*\**P*<0.01, \*\*\**P*<0.001 and \*\*\*\* *P*<0.0001).

443

#### 444 **PTX3 polymorphisms**

445 To explore the significance of these results in human, we analyzed the association of  
446 human *PTX3* gene polymorphisms with IPD in a cohort of 57 patients and 521 age- and sex-  
447 matched healthy controls. We focused in particular on two intronic SNPs (rs2305619 and  
448 rs1840680) and a third polymorphism (rs3816527) in the coding region of the protein  
449 determining an amino-acid substitution at position 48 (+734A/C). These SNPs are associated  
450 with increased susceptibility to infection to selected microorganisms (Chiarini et al., 2010;  
451 Cunha et al., 2014; He et al., 2018; Olesen et al., 2007). In addition, the +734A allele was  
452 associated in various studies with decreased PTX3 circulating levels (Barbati et al., 2012;  
453 Bonacina et al., 2019; Cunha et al., 2014).

454 Similar frequencies were observed for the +734A allele in patients and controls  
 455 (67.54% and 61.58%, respectively,  $P=0.213$ , Table 1). However, when the haplotypes  
 456 determined by the three SNPs (rs2305619, rs3816527, rs1840680) were examined, we found  
 457 that the AAA haplotype was twice as frequent in IPD patients as in healthy controls (9.67%  
 458 and 4.26% respectively,  $P=0.0102$ , Table 2). This association was even stronger when  
 459 considering two SNPs only (+281A and +734A), including the one associated with lower  
 460 levels of the protein (11.4% and 4.94% respectively,  $P=0.0044$ , Table 2). These observations  
 461 suggest that also in humans PTX3 could play a role in the control of *S. pneumoniae* infection.  
 462

**Table 1. Frequency distribution of PTX3 gene single nucleotide polymorphisms (SNPs) in IPD patients and controls.**

| SNP       | Alleles | Amino acid change | Associated allele | Frequency (%)      |                 | $\chi^2$ | OR (95%)            | P-value |
|-----------|---------|-------------------|-------------------|--------------------|-----------------|----------|---------------------|---------|
|           |         |                   |                   | IPD patient (n=57) | Control (n=521) |          |                     |         |
| rs2305619 | +281    |                   | A                 | 43.86              | 43.44           | 0.007    | 1.02<br>(0.69-1.50) | 0.931   |
|           | A/G     |                   | G                 | 56.14              | 56.56           |          |                     |         |
| rs3816527 | +734    | Ala→Asp           | C                 | 32.46              | 38.42           | 1.552    | 0.77<br>(0.51-1.16) | 0.213   |
|           | C/A     |                   | A                 | 67.54              | 61.58           |          |                     |         |
| rs1840680 | +1149   |                   | A                 | 42.11              | 42.49           | 0.006    | 0.98<br>(0.67-1.46) | 0.938   |
|           | A/G     |                   | G                 | 57.89              | 57.51           |          |                     |         |

463

**Table 2. Haplotype analysis for PTX3 gene in IPD patients and controls.**

| rs2305619 | rs3816527 | rs1840680 | Frequency (%)       |                  | $\chi^2$ | P-value       |
|-----------|-----------|-----------|---------------------|------------------|----------|---------------|
|           |           |           | IPD patients (n=57) | Controls (n=521) |          |               |
| G         | A         | G         | 56.15               | 56.51            | 0.005    | 0.9409        |
|           | A         | G         | 56.14               | 56.59            | 0.008    | 0.9269        |
|           | A         | G         | 57.89               | 57.41            | 0.010    | 0.9202        |
| A         | C         | A         | 32.44               | 38.28            | 1.488    | 0.2226        |
|           | C         | A         | 32.46               | 38.47            | 1.577    | 0.2091        |
|           | C         | A         | 32.46               | 38.33            | 1.51     | 0.2191        |
| A         | A         | A         | 9.67                | 4.26             | 6.604    | <b>0.0102</b> |
|           | A         | A         | 11.4                | 4.94             | 8.129    | <b>0.0044</b> |
|           | A         | A         | 9.65                | 4.26             | 6.533    | <b>0.0106</b> |
| A         | A         | G         | 1.73                | 0.95             | 0.610    | 0.4348        |

464

465 To assess whether the +734A/C polymorphism in the coding region of the human  
 466 PTX3 gene affects the protein's interaction with P-selectin, two recombinant PTX3 constructs  
 467 were made that carry either D (Asp) or A (Ala) at position 48 of the preprotein sequence  
 468 (corresponding to the A and C alleles of the + 734A/C polymorphism, respectively) (Cunha et

469 al., 2014). These two proteins had almost identical electrophoretic mobilities when run on  
470 denaturing gels both in reducing and non-reducing conditions (Figure 8A), where they  
471 showed a pattern of bands consistent with previous studies (Inforzato et al., 2008). Also,  
472 similar chromatograms were recorded when the D48 and A48 variants were resolved on a  
473 SEC column in native conditions (Figure 8B). Given that protein glycosylation is a major  
474 determinant of the interaction of PTX3 with P-selectin (Deban et al., 2010), it is worth  
475 pointing out that the +734A/C polymorphism does not affect structure and composition of the  
476 PTX3 oligosaccharides, with major regard to their terminal residues of sialic acid (Bally et al.,  
477 2019). Therefore, the allelic variants of the PTX3 protein were virtually identical in terms of  
478 quaternary structure and glycosidic moiety, which makes them suitable to comparative  
479 functional studies. In this regard, when assayed in solid phase binding experiments, these two  
480 proteins equally bound plastic-immobilized P-selectin (Figure 8C), and C1q (Figure 8D, here  
481 used as a control), indicating that the +734A/C polymorphism (i.e., the D/A amino acid  
482 substitution at position 48 of the PTX3 preprotein) does not affect the interaction of this PRM  
483 with P-selectin. It is therefore conceivable that the +734A/C SNP (and the others investigated  
484 in our association study) determines reduced expression rather than function of the PTX3  
485 protein *in vivo*, as observed in other opportunistic infections (Cunha et al., 2014).

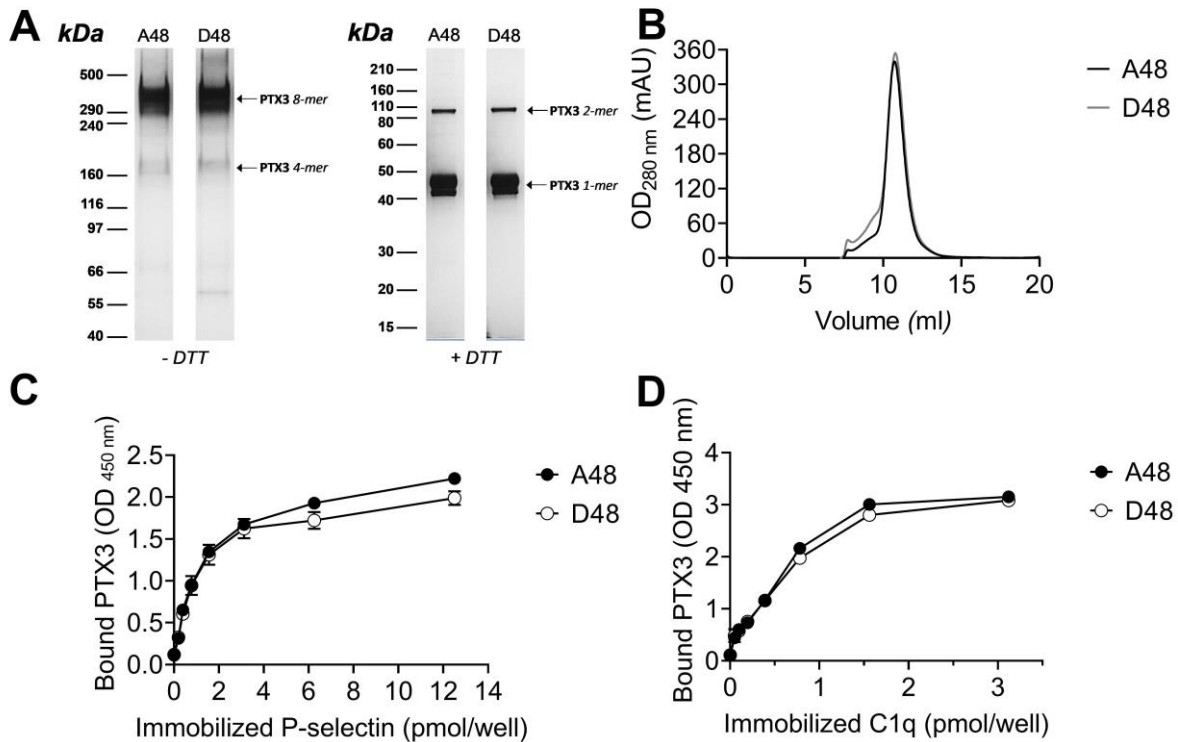

486

487 **Figure 8. Biochemical characterization of the D48 and A48 allelic variants of PTX3 and**  
488 **their binding to P-selectin.**

489 (A) 500 ng/lane of purified recombinant PTX3 (A48 and D48 from HEK293 cells) were run  
490 under denaturing conditions on Tris-Acetate 3–8% (w/v) and Bis-Tris 10% (w/v) protein gels,  
491 in the absence (-) and presence (+), respectively, of dithiothreitol (DTT). Gels are shown with  
492 molecular weight markers on the left, and position of the PTX3 monomers, dimers, tetramers,  
493 and octamers (1-, 2-, 4-, and 8-mers, respectively) on the right. (B) 200  $\mu$ g aliquots of either  
494 one of the two allelic variants were separated on a Superose 6 10/300 GL size exclusion  
495 chromatography (SEC) column in non-denaturing conditions, with elution monitoring by UV  
496 absorbance at 280 nm. An overlay of individual chromatograms is presented. (C and D) The  
497 effect of the +734A/C polymorphism on the interaction of PTX3 with P-selectin was  
498 investigated by a solid phase binding assay using microtiter plates coated with the indicated  
499 amounts of P-selectin or C1q (here, used as a control) that were incubated with either of the  
500 A48 and D48 variants (both at 3 nM). Bound proteins were revealed with an anti-human

501 PTX3 polyclonal antibody, and results are expressed as optical density at 450 nm (OD 450  
502 nm), following background subtraction (n=3, mean  $\pm$ SD). Data shown in panels A to D are  
503 representative of three independent experiments with similar results.

504

## 505 **Discussion**

506 *S. pneumoniae* is the most common cause of a range of infections, including community-  
507 acquired pneumonia, a pathological condition that affects mainly adults aged 65 years or older  
508 and infants under one year of age. It is well known that inflammation plays a crucial role  
509 during lung infections and dictates the resolution of pneumonia, but at the same time,  
510 exaggerated inflammation can be detrimental (Sohail et al., 2018). Therefore, a strict control  
511 of the inflammatory response is essential.

512 The present study was aimed at assessing the role of PTX3 in invasive pneumococcal  
513 infection. PTX3 is a member of the pentraxin family highly conserved in evolution and  
514 locally produced by different cell types in response to pro-inflammatory stimuli and microbial  
515 components. The protein has multifunctional properties, including in particular a regulatory  
516 role on inflammation (Garlanda et al., 2018). In a well-characterized murine model of  
517 invasive pneumococcal infection, PTX3 expression was rapidly upregulated in the alveolar  
518 and bronchiolar compartments of the lungs. The systemic dissemination of pneumococcus  
519 was associated with an increase of PTX3 serum levels. As expected, PTX3 levels were at  
520 least in part induced by IL-1 $\beta$ , massively produced in response to pneumococcus.

521 Both myeloid and endothelial cells can produce PTX3 in response to inflammatory  
522 cytokines. Polymorphonuclear leukocytes were able to release PTX3 after stimulation with  
523 *S. pneumoniae*, however levels of the protein were similar in WT and in neutropenic *Csfr3*<sup>-/-</sup>  
524 animals infected with *S. pneumoniae*. Bone marrow chimeras and conditional mice definitely  
525 demonstrated that stromal cells, and in particular endothelial cells, were a major source of



526 PTX3 in this model of pneumococcal infection. Production of PTX3 by non-hematopoietic  
527 cells has been previously reported in other experimental settings. In a murine model of arterial  
528 thrombosis induced by FeCl<sub>3</sub>, PTX3 was only expressed by vascular cells (Bonacina et al.,  
529 2016). Similarly, in a murine model of skin wound-healing, non-hematopoietic cells were the  
530 major producers of PTX3 whereas neutrophils showed a minor contribution (Doni et al.,  
531 2015).

532 *Ptx3* genetic deficiency was associated with a higher susceptibility to *S. pneumoniae*. A  
533 defective control of bacterial load, associated with a higher mortality rate, was observed  
534 during the invasive phase of the infection, and PTX3 administration rescued the phenotype. In  
535 humans, *PTX3* gene polymorphisms were already described to have an impact on the  
536 susceptibility to selected infections, in particular *Mycobacterium tuberculosis*, *Pseudomonas*  
537 *aeruginosa* and urinary tract infections (Chiarini et al., 2010; Jaillon et al., 2014; Olesen et al.,  
538 2007). In addition, *PTX3* genetic variants are associated with the risk to develop invasive  
539 aspergillosis or Cytomegalovirus reactivation in patients undergoing allogeneic stem cell  
540 transplant (Campos et al., 2019; Cunha et al., 2014). In the present study, in a cohort of 57  
541 patients with IPD and 521 healthy controls haplotypes determined by *PTX3* gene  
542 polymorphisms were associated with *S. pneumoniae* infection. Thus, genetic deficiency in  
543 mice and genetic polymorphisms in humans suggest that PTX3 plays an important role in the  
544 control of invasive pneumococcal infection.

545 Various mechanisms are potentially involved in the protective role of PTX3 against  
546 infectious agents. In most cases PTX3-mediated protection has been related to the pro-  
547 phagocytic activity of the protein (Garlanda et al., 2002; Jaillon et al., 2014; Moalli et al.,  
548 2011, 2010). PTX3 binds selected fungal, bacterial and viral pathogens, including *Aspergillus*  
549 *fumigatus*, *Pseudomonas aeruginosa*, *Shigella flexneri*, uropathogenic *Escherichia coli*,  
550 Influenza virus, murine cytomegalovirus as well as SARS-CoV-2 nucleocapsid (Porte et al.,

551 2019; Stravalaci et al., 2022), acting in most cases as an opsonin and amplifying phagocytosis  
552 (Garlanda et al., 2002; Jaillon et al., 2014; Moalli et al., 2010). These microorganisms are  
553 naturally susceptible to phagocytosis (Hasenberg et al., 2011; Lovewell et al., 2014; Schwab  
554 et al., 2017) whereas virulent *S. pneumoniae* developed various mechanisms preventing  
555 phagocytosis (Andre et al., 2017; Weiser et al., 2018). In this study, we observed that PTX3  
556 could bind *S. pneumoniae*, promoting its phagocytosis *in vitro* by human neutrophils, only at  
557 very high concentrations. *Ptx3* deficiency did not affect the local phagocytosis by recruiting  
558 neutrophils and, given the low efficiency of the binding to pneumococcus, pre-opsonisation of  
559 the inoculum did not modify the kinetic of infection. Thus PTX3-mediated contribution to  
560 resistance to *S. pneumoniae* is independent of enhanced phagocytosis.

561 The short pentraxin CRP, distantly related to PTX3, acts as an opsonin for various  
562 microorganisms, including pneumococcus (Bottazzi et al., 2010; Szalai, 2002). However, this  
563 effect is dependent on the serotype, specifically on the expression of phosphatidylcholine in  
564 the capsule. PTX3 does not interact with phosphatidylcholine (Bottazzi et al., 1997). In  
565 addition, serotypes 1 and 3 gave similar results in terms of kinetic of PTX3 production after  
566 infection and bacterial load in *Ptx3*<sup>-/-</sup> mice. These results suggest that the short pentraxin CRP  
567 and the long pentraxin PTX3 have distinct spectra of microbial recognition and role in  
568 antimicrobial resistance.

569 PTX3 exerts regulatory roles on complement activation by interacting with components of  
570 all the three pathways, i.e. the classical, alternative and lectin pathways. In all cases, PTX3  
571 leads to a reduced activation of the complement cascade, thereby reducing the tissue damage  
572 associated with an activation out of control (Haapasalo and Meri, 2019). The higher  
573 susceptibility to pneumococcus infection observed in *Ptx3*-deficient mice was not related to  
574 failed regulation of complement activity. In fact, similar levels of complement fragments, in

575 particular of the two anaphylatoxins C3a and C5a, were found in lung homogenates of wild  
576 type and *Ptx3*<sup>-/-</sup> infected mice.

577 In invasive pneumococcal infection neutrophils represent a double edged sword. Several  
578 lines of evidence, including depletion using anti-Ly6G antibody, suggest that in early phases  
579 of infection neutrophils are an essential component of resistance to *S. pneumoniae* as expected  
580 (Bou Ghanem et al., 2015). In contrast, during the invasive phase neutrophils depletion was  
581 protective, limiting tissue damage and associated bacterial invasion. In the present study, *Ptx3*  
582 genetic deficiency was associated with uncontrolled inflammation and bacterial invasion  
583 sustained by enhanced neutrophils accumulation and vascular damages, that could lead to an  
584 access for pneumococcus to nutrients in the alveolar space allowing pneumococcal outgrowth  
585 and dissemination, as already described (Sender et al., 2020). Other studies have shown a  
586 protective effect against pneumococcus respiratory infection by controlling lung damage,  
587 reducing the neutrophil accumulation and inflammation (Madouri et al., 2018; Porte et al.,  
588 2015; Tavares et al., 2016). These results are consistent with a yin/yang role of neutrophils in  
589 invasive pneumococcus infection (Nathan, 2006). In contrast with our results, a recent paper  
590 reported a proinflammatory role of PTX3 in the context of serotype 2 *S. pneumoniae* infection  
591 (Koh et al., 2017). However, when we used D39 serotype 2 pneumococcus in our setting and  
592 with our mice, we were not able to find any difference between WT and *Ptx3*<sup>-/-</sup> pneumococcal  
593 induced inflammatory responses, suggesting that other factors, including housing conditions,  
594 could have impact on the phenotype.

595 Neutrophil infiltration at sites of bacterial invasion and inflammation is driven by  
596 chemoattractants and adhesion molecules (Maas et al., 2018). Neutrophil attracting  
597 chemokines and complement C5a and C3a were no different in *Ptx3*<sup>-/-</sup> and WT mice. PTX3  
598 has been shown to serve as a negative regulator of neutrophil recruitment by interacting with  
599 P-selectin (Deban et al., 2010; Lech et al., 2013). *In-vitro* studies and *in-vivo* experiments

600 which took advantage of P-selectin-deficient *Selp*<sup>-/-</sup> mice and *Ptx3*<sup>-/-</sup>*Selp*<sup>-/-</sup> double deficient  
601 mice were designed to assess the relevance of this pathway. The obtained results indicated  
602 that the defective control of invasive pneumococcal infection observed in *Ptx3*<sup>-/-</sup> mice is due  
603 to unleashing of P-selectin-dependent recruitment of neutrophils which promote bacterial  
604 invasion. Thus, by taming uncontrolled P-selectin dependent recruitment of neutrophils, the  
605 fluid phase pattern recognition molecule PTX3 plays an essential role in tuning inflammation  
606 and resistance against invasive pneumococcus infection.

607

## 608 **Materials and Methods**

### 609 **Mice**

610 All mice used in this study were on a C57BL/6J genetic background. PTX3-deficient mice  
611 were generated as described in (Garlanda et al., 2002). *Ptx3*<sup>-/-</sup> and *P-selectin* (*Selp*<sup>-/-</sup>) double  
612 deficient mice were generated as described in (Doni et al., 2015). *Csf3r*<sup>-/-</sup> mice were generated  
613 as described in (Ponzetta et al., 2019). Wild-type (WT) mice were obtained from Charles  
614 River Laboratories (Calco, Italy) or were cohoused littermates of the gene-deficient mice used  
615 in the study. *Ptx3*<sup>-/-</sup>, *Csf3r*<sup>-/-</sup>, *Ptx3loxP*<sup>+/+</sup>*Cdh5cre*<sup>+/+</sup>, *Ptx3loxP*<sup>+/+</sup>*Cdh5cre*<sup>-/-</sup>, *Selp*<sup>-/-</sup>, *Ptx3*<sup>-/-</sup>  
616 *Selp*<sup>-/-</sup> and WT mice were bred and housed in individually ventilated cages in the SPF animal  
617 facility of Humanitas Clinical and Research Center or purchased from Charles River (Milan)  
618 and acclimated in the local animal facility for at least one weeks prior to infection. All  
619 animals were handled in a vertical laminar flow cabinet. Procedures involving animals  
620 handling and care were conformed to protocols approved by the Humanitas Clinical and  
621 Research Center (Rozzano, Milan, Italy) in compliance with national (4D.L. N.116, G.U.,  
622 suppl. 40, 18-2-1992 and N. 26, G.U. march 4, 2014) and international law and policies  
623 (European Economic Community Council Directive 2010/63/EU, OJ L 276/33, 22.09.2010;  
624 National Institutes of Health Guide for the Care and Use of Laboratory Animals, U.S.

625 National Research Council, 2011). All efforts were made to minimize the number of animals  
626 used and their suffering. The study was approved by the Italian Ministry of Health (742/2016-  
627 PR). Experiments were performed using sex- and age-matched mice.

628

### 629 **Bacterial preparation**

630 Each *S. pneumoniae* strain (serotype 1 ST304 and serotype 3 ATCC6303) was cultured and  
631 stored as previously described (Porte et al., 2015). Briefly, Todd-Hewitt yeast broth (THYB)  
632 (Sigma-Aldrich) was inoculated with fresh colonies grown in blood agar plates and incubated  
633 at 37°C until an optical density at 600 nm (OD<sub>600</sub>) of 0.7 to 0.9 units was reached. Cultures  
634 were stored at -80°C in THYB with 12% glycerol for up to 3 months. GFP-expressing  
635 serotype 1 was constructed as described previously (Kjos et al., 2015). Clinical isolate E1586  
636 serotype 1 *S. pneumoniae* was grown at 37°C in THYE until an OD<sub>600</sub> of 0.1, then 100 ng/ml  
637 of synthetic competence-stimulating peptide 1 (CSP-1; Eurogentec) was added for 12min at  
638 37°C to activate transformation machinery. *P<sub>hlpA</sub>-hlpA-gfp\_Cam<sup>r</sup>* DNA fragment provided by  
639 Jan-Willem Veening's group (Kjos et al., 2015) was added to the activated cells and  
640 incubated 20min at 30°C. Growth medium was diluted 10 times with fresh THYB medium  
641 and incubated 1.5h at 37°C. Transformants were selected by plating 5% sheep blood Tryptic  
642 Soy Agar plates (TSA; BD Biosciences) containing 4.5 µg/ml of chloramphenicol, then  
643 cultured and stored as described above.

644

### 645 **Mouse model of infection**

646 *S. pneumoniae* serotype 3 and serotype 1 were used to induce pneumococcal invasive  
647 infection as described previously (de Porto et al., 2019; Porte et al., 2015). For induction of  
648 pneumonia, each mouse was anesthetized by intraperitoneal injection of 100 mg/kg of  
649 ketamine plus 10 mg/kg of xylazine in 200µl of PBS. Then 5x10<sup>4</sup> or 10<sup>6</sup> colony-forming units

650 (CFU) in 30  $\mu$ L were inoculated intranasally to induce lethal infection by serotype 3 and  
651 serotype 1 respectively. Mouse survival was recorded every 12h. To rescue *Ptx3* deficient  
652 mice, they were treated intraperitoneally with 10  $\mu$ g/200  $\mu$ l of recombinant PTX3 prior and  
653 24h after infection. Prophylaxis or treatment have been done by intranasal instillation of  
654 1  $\mu$ g/30  $\mu$ l recombinant PTX3 prior and 12h after infection respectively. Neutrophil  
655 recruitment modulation has been performed by treating intraperitoneally with 200  $\mu$ g/200  $\mu$ l  
656 of anti-Ly6G depleting antibody (*InVivoPlus* 1A8; BioXcell) or control isotype (*InVivoPlus*  
657 rat IgG2a; BioXcell). Blocking of P-selectin was realized by treating intraperitoneally with  
658 50  $\mu$ g/100  $\mu$ l of anti-CD62P depleting antibody (rat RB40.34 NA/LE; BD Biosciences) or  
659 control isotype (rat IgG1  $\lambda$ ; BD Biosciences).

660 At indicated time, mice were sacrificed with CO<sub>2</sub>, bronchoalveolar lavage fluid (BAL),  
661 serum, lungs, and spleen were harvested and homogenated in PBS for CFU counting or in  
662 isotonic buffer (Tris HCl 50 mM, EDTA 2 mM, PMSF 1 mM [Roche Diagnostics GmbH],  
663 Triton X-100 1% [Merck Life Science], cComplete EDTA-free protease inhibitor cocktail  
664 [Roche Diagnostics GmbH]) for protein measurement on the supernatant. Bacterial loads per  
665 organ were counted by serial dilution plated on 5% sheep blood TSA plates after 12h 37°C  
666 5% CO<sub>2</sub>. Lung CFU were representative of the local infection while splenic CFU were  
667 considered as indicator of systemic dissemination of pneumococcus through the bloodstream  
668 (Hommes et al., 2014; Porte et al., 2015; Schouten et al., 2014). For histological analysis, the  
669 entire lung was collected in organ cassette and fixed overnight in 4% paraformaldehyde  
670 (PFA) (immunostaining) or in 10% neutral buffered formalin (hematoxylin eosin staining).

671

### 672 **Recombinant PTX3.**

673 Recombinant human PTX3 was purified from culture supernatant of stably transfected  
674 Chinese hamster ovary (CHO) cells by immunoaffinity as previously described (Bottazzi et

675 al., 1997). Purity of the recombinant protein was assessed by SDS-PAGE followed by silver  
676 staining. Biotinylated PTX3 (bPTX3) was obtained following standard protocols.  
677 Recombinant PTX3 contained <0.125 endotoxin units/ml as checked by the Limulus  
678 amoebocyte lysate assay (BioWhittaker, Inc.). For *in vivo* experiments recombinant PTX3 was  
679 diluted in PBS.

680 To assess the effect on the interaction with P-selectin of the rs3816527 (+734A/C)  
681 polymorphism in the human PTX3 gene (that results into a D to A amino acid substitution at  
682 position 48 of the preprotein), two constructs were generated by overlapping PCR site-  
683 directed mutagenesis, and the corresponding recombinant proteins were expressed in and  
684 purified from a HEK293 cell line as previously described (Cunha et al. N Engl J Med. 2014).  
685 Aliquots of the purified A48 or D48 PTX3 proteins were run under denaturing conditions on  
686 Tris-Acetate 3–8% (w/v) and Bis-Tris 10% (w/v) protein gels (GE Healthcare Life Sciences),  
687 in the absence and presence, respectively, of dithiothreitol as reducing agent. Following  
688 separation, protein bands were stained with silver nitrate (ProteoSilver Silver Stain Kit,  
689 Sigma-Aldrich). The two recombinant proteins were analyzed in non-denaturing conditions  
690 on a Superose 6 10/300 GL size exclusion chromatography (SEC) column, equilibrated and  
691 eluted with PBS at a flow rate of 0.5 ml/min, using an ÄKTA Purifier FPLC system (GE  
692 Healthcare Life Sciences). Protein separation and elution was monitored and recorded by UV  
693 absorbance at 280 nm.

694

### 695 **Cell culture and stimulation**

696 Human and murine endothelial cell lines were cultivated to have a confluent monolayer in 12-  
697 well culture plates (about  $10^5$  cells/well). Human Umbilical Vein Endothelial Cells (HUVEC)  
698 were grown in 1% gelatin coated wells in M199 medium (Sigma-Aldrich) containing 20%  
699 fetal bovine serum (FBS), 100 µg/ml of Endothelial Cell Growth Supplement (ECGS, Sigma-



700 Aldrich), 100 µg/ml of heparin (Veracer; Medic Italia) and 1% penicillin and streptomycin  
701 (Pen/Strep). Murine lung capillary endothelial cell line (1G11) was grown in 1% gelatin  
702 coated wells in DMEM with 20% FBS, 100 µg/ml of ECGS, 100 µg/ml of heparin and 1%  
703 Pen/Strep.

704 Human neutrophils were purified from freshly collected peripheral blood in Lithium Heparin  
705 Vacutainer (BD Bioscience) and separated by a two-steps gradient separation as previously  
706 described by Kremaserova and Nauseef (Quinn and DeLeo, 2020). Briefly leukocytes and  
707 erythrocytes were separated by a 3% Dextran from Leuconostoc spp. (Sigma-Aldrich)  
708 sedimentation for 40min, then leukocytes in the supernatant were separated with Lympholyte-  
709 H Cell Separation Media (Cerdalane) and cells from the lower liquid interphase were rinsed  
710 with RPMI.

711

#### 712 **Generation of bone marrow chimeras.**

713 C57BL/6J wild-type or *Ptx3*-deficient mice were lethally irradiated with a total dose of 900  
714 cGy. Then, 2h later, mice were injected in the retro-orbital plexus with  $4 \times 10^6$  nucleated bone  
715 marrow cells obtained by flushing of the cavity of a freshly dissected femur from wild-type or  
716 *Ptx3*-deficient donors. Recipient mice received gentamycin (0.8 mg/ml in drinking water)  
717 starting 10 days before irradiation and maintained for 2 weeks. At 8 weeks after bone marrow  
718 transplantation, animals were infected.

719

#### 720 **Lung histology and immunostaining**

721 Immunostaining was performed on 8 µm sections from 4% PFA-fixed, dehydrate in sucrose  
722 solution and mounted in OCT embedding compound and stored at -80°C. PTX3 staining was  
723 performed as described previously (Jaillon et al., 2014). Briefly, sections were stained with  
724 5 µg/ml of rabbit polyclonal antibody anti-human PTX3 as a primary antibody and with

725 MACH 1 universal polymer (Biocare Medical) as a secondary antibody. Staining was  
726 revealed with 3,3'Diaminobenzidine (DAB; Biocare Medical) and counterstained with  
727 hematoxylin and eosin. Slides were scanned and analyzed with Image-pro (Media  
728 Cybernetics) to evaluate the percentage of stained area normalized by analyzing the same area  
729 for all animals corresponding to about 25% of the section.

730 Lung histological analysis was performed on formalin-fixed lungs included in paraffin and  
731 3  $\mu\text{m}$  sections were stained with hematoxylin and eosin. A blind analysis was done on 3  
732 sections per animal distant at least of 150  $\mu\text{m}$  and inflammatory foci were measured  
733 determining the area of foci and scores. Scores were determined separating small foci (<0.5  
734 mm) and large foci (>0.5 mm) and then calculating as “Histological score = small foci  
735 + large foci x 3”. Vascular damage was scored according to a 5-category scale for  
736 perivascular edema and hemorrhage, in which 0 is absent and 1 to 4 correspond to minimal  
737 (or focal), mild (or multifocal, <10% of blood vessels), moderate (or multifocal, 10-50% of  
738 blood vessels) and marked (or multifocal, >50% of blood vessels), respectively.

739

#### 740 **Binding assay**

741 The binding of PTX3 on *S. pneumoniae* was assessed as described previously (Bottazzi et al.,  
742 2015). Briefly,  $10^6$  CFU *S. pneumoniae* were washed in PBS<sup>+/+</sup> and suspend with 10  $\mu\text{g}/\text{ml}$ ,  
743 50  $\mu\text{g}/\text{ml}$  or 500  $\mu\text{g}/\text{ml}$  of biotinylated recombinant PTX3 for 40min at room temperature.  
744 Bacteria were washed with PBS<sup>+/+</sup> and stained with streptavidin-Alexa Fluor 647 (4  $\mu\text{g}/\text{ml}$ ,  
745 Invitrogen) for 30min at 4°C. Washed bacteria were then fixed with 4% formalin for 15min at  
746 4°C. Bacteria were then read by flow cytometry using FACSCanto II (BD Bioscience).  
747 Unstained *S. pneumoniae* were used as negative control.  
748 Binding to P-selectin of the A48 and D48 variants of PTX3 from HEK293 cells was then  
749 assessed using 96 well Maxisorp plates (Nunc) coated with a recombinant form of the human

750 P-selectin ectodomain (spanning the 42-771 sequence of the preprotein) commercially  
751 available from R&D Systems by adaptation of a published protocol (Bally et al., 2019).  
752 Purified C1q from human serum (Merck) was used as a control.

753

754 Cells were stimulated after a wash with the same culture media without Pen/Strep and then  
755 incubated with the corresponding medium containing  $10^6$  CFU *S. pneumoniae*, 20 ng/ml  
756 recombinant IL-1 $\beta$  (Preprotech) or 100 ng/ml lipopolysaccharide from *Escherichia coli*  
757 O55:B5 (LPS, Sigma-Aldrich) for 6h at 37°C. Cells were then lysate with 300  $\mu$ l of PureZOL  
758 RNA isolation reagent (Bio-Rad). Human neutrophils were stimulated with  $10^7$  CFU/ml of *S.*  
759 *pneumoniae* serotype 3 or 10 ng/ml of phorbol myristate acetate (PMA) during 6h at 37°C,  
760 PTX3 released in the supernatant was measured by ELISA, as described below.

761

#### 762 **Neutrophil transmigration assay**

763 Neutrophil migration assay across an endothelium monolayer was performed as previously  
764 described by Bou Ghanem and collaborators (Bou Ghanem et al., 2015). Briefly, basolateral  
765 sides of HUVEC monolayer grown 4 days on a 3  $\mu$ m polyester membrane Transwell  
766 (Corning) was infected with *S. pneumoniae* ( $10^6$  CFU/ml in RPMI) added the lower chamber,  
767 whereas 100  $\mu$ l PBS<sup>+/+</sup> containing 20 ng/ml recombinant IL-1 $\beta$  supplemented with 100  $\mu$ g/ml  
768 PTX3 and/or 100  $\mu$ g/ml mouse anti-human CD62P (clone AK-4, BD Bioscience) was added  
769 to the apical side (upper chamber). After 2.5h at 37°C,  $5 \times 10^5$  human neutrophils (in 100  $\mu$ l  
770 RPMI) were added to the basolateral side. After 2.5h at 37°C, neutrophils in the lower  
771 chamber were counted in triplicate. Neutrophil transmigration without infection was  
772 performed in parallel as negative control.

773

#### 774 **Killing assay**

775 Neutrophil killing of *S. pneumoniae* was evaluated by a resazurin-based cell viability assay  
776 using murine purified neutrophils. Briefly, murine neutrophils were purified from bone-  
777 marrow as previously described (Moalli et al., 2010). A volume of 50  $\mu$ l PBS, containing  
778  $4 \times 10^5$  CFU *S. pneumoniae* serotype was placed into sterile round bottom Corning 96-well  
779 polypropylene microplate and incubated for 1 hour or 3 hours at 37 °C with 100  $\mu$ l RPMI  
780 (10% FBS and GM-CSF 10 ng/ml) containing  $2 \times 10^5$  murine purified neutrophils from WT  
781 and *Ptx3*<sup>-/-</sup> mice and 50  $\mu$ l of 10% autologous plasma (WT or *Ptx3*<sup>-/-</sup>) diluted in RPMI +GM-  
782 CSF (10 ng/ml). After incubation, plates were immediately cooled on ice and cold-  
783 centrifuged, and then supernatant removed. *S. pneumoniae* incubated without neutrophils  
784 were used as a negative control. Heat killed (60°C, 2 hours) *S. pneumoniae* were considered  
785 as positive control in the assay. Neutrophils were then lysate with 200  $\mu$ l of distilled water  
786 and vigorous shaking. Remaining *S. pneumoniae* were then suspend in 20  $\mu$ l RPMI.  
787 Preparation of AlamarBlue Cell Viability Reagent and test was performed according with  
788 manufacturer's instructions (ThermoFisher Scientific-Invitrogen). A volume of 180  $\mu$ l  
789 AlamarBlue solution (18  $\mu$ l of AlamarBlue reagent and 162  $\mu$ l of RPMI) was added to each  
790 well. After 4 hour incubation at 37 °C, fluorescence (excitation/emission at  $\approx$ 530–  
791 560/590 nm) intensity was measured by microplate reader Synergy H4 (BioTek, France).  
792 Results represent ratio of fluorescence intensity values relative to those measured in negative  
793 controls.

794

#### 795 **Gene expression quantification by real-time RT-PCR**

796 Organs homogenated in PureZOL RNA isolation reagent (Bio-Rad) and cell lysate RNAs  
797 were extracted with the Direct-zol RNA Miniprep (Zymo Research) and reverse transcribed  
798 with the high-capacity cDNA archive kit (Applied Biosystems) following the manufacturer's  
799 instructions. cDNA was amplified using the Fast SYBR Green Master Mix on a QuantStudio

800 7 Flex Real Time PCR Systems (Applied Biosystems). The sequences of primer pairs (Sigma-  
801 Aldrich) specific for murine *Gapdh* (Forward, 5'-GCAAAGTGGAGATTGTTGCCAT-3',  
802 Reverse, 5'-CCTTGACTGTGCCGTTGAATTT-3') and *Ptx3* (Forward, 5'-  
803 CGAAATAGACAATGGACTCCATCC-3', Reverse, 5'-CAGGCGCACGGCGT-3') were  
804 used to evaluate their expression. Relative mRNA levels ( $2^{-\Delta\Delta CT}$ ) were determined by  
805 comparing first the PCR cycle thresholds (CT) for *Ptx3* and *Gapdh* ( $\Delta CT$ ), and second, the  
806  $\Delta CT$  values for the infected/treated and uninfected/untreated (mock/control) groups ( $\Delta\Delta CT$ ).  
807 All amplifications were performed in triplicates.

808

### 809 **ELISA**

810 Lung homogenates and serum levels of murine C3a, C5a, CXCL1, CXCL2, IL-1 $\beta$ , MPO,  
811 PTX3 and P-selectin were determined by enzyme-linked immunosorbent assay (DuoSet  
812 ELISA, R&D Systems and Cloud-Clone corp) following the manufacturer's instructions.  
813 Human PTX3 was determined with an in-house ELISA as previously described by Jaillon and  
814 collaborators (Jaillon et al., 2014). Briefly, anti-PTX3 monoclonal antibody (1  $\mu$ g/ml, clone  
815 MNB4) in carbonate buffer (carbonate buffer 15 mM pH 9.6) was coated overnight at 4°C in  
816 96 well ELISA plates (Nunc). Wells were then blocked with 5% dry milk for 2h at room  
817 temperature. Cell culture supernatants, were incubated for 2h at room temperature. Biotin-  
818 labeled polyclonal rabbit anti-PTX3 antibody (100  $\mu$ g/ml) was used for the detection and  
819 incubated 1h at 37°C. Plates were incubated with peroxidase-labeled streptavidin (SB01-61;  
820 Biospa) for 1h at 37°C. Bound antibodies were revealed using the TMB substrate (Sigma  
821 Aldrich) and 450 nm absorbance values were read with an automatic ELISA reader  
822 (VersaMax; Molecular Devices).

823

### 824 **Flow cytometry**

825 BAL fluid samples were obtained after intratracheal injection of 1 ml of PBS supplemented  
826 with 5% FBS. Lung cells were isolated after digestion in PBS, supplemented with 20% FBS,  
827 2 mM HEPES (Lonza), 100 µg/ml collagenase from *Clostridium histolyticum* type IV  
828 (Sigma-Aldrich) and 20 µg/ml of DNase (Roche Diagnostics GmbH) in C-tubes processed  
829 with gentleMACS Octo Dissociator with heaters according to the manufacturer's instructions  
830 (Miltenyi Biotec). Lysate were pellet (500 g 8min) and red blood cells were lysate with 500 µl  
831 of ACK lysing buffer (Lonza) for 5min. Reaction were stopped with PBS, the cell  
832 suspensions were filtered through a 70 µm filter, count using Türk solution (Sigma-Aldrich)  
833 and 10<sup>6</sup> cells were pelleted by centrifugation (500 g, 8 min). Live/dead fixable aqua  
834 (Invitrogen) staining were realized following manufacturer's instruction and stopped in FACS  
835 buffer (PBS, 2% FBS, 2 mM EDTA, 0.05% NaN<sub>3</sub>). Fc-receptors were blocked with anti-  
836 mouse CD16/CD32 (20 µg/ml, clone 93; Invitrogen) for 20min. Cells were stained with an  
837 antibody panel able to distinguish macrophages (CD45<sup>+</sup>, CD11b<sup>-</sup>, SiglecF<sup>+</sup>), neutrophils  
838 (CD45<sup>+</sup>, CD11b<sup>+</sup>, SiglecF<sup>-</sup>, Ly6C<sup>+</sup>, Ly6G<sup>+</sup>), monocytes (CD45<sup>+</sup>, CD11b<sup>+</sup>, SiglecF<sup>-</sup>,  
839 Ly6C<sup>low/moderate/high</sup>, Ly6G<sup>-</sup>) and eosinophils (CD45<sup>+</sup>, CD11b<sup>+</sup>, SiglecF<sup>+</sup>) as described in Figure  
840 S7: anti-CD45-Brilliant Violet 605 (2 µg/ml, clone 30-F11; BD Bioscience), anti-CD11b  
841 APC-Cy7 (1 µg/ml, clone M1/70; BD Bioscience), anti-SiglecF-eFluor 660 (1.2 µg/ml, clone  
842 1RNM44N; Invitrogen), anti-Ly6C-FITC (3 µg/ml, clone AL-21; BD Bioscience), anti-  
843 Ly6G-PE-CF594 (0.4 µg/ml, clone 1A8; BD Bioscience). Flow cytometric analysis was  
844 performed on BD LSR Fortessa and analyzed with the BD FACSDiva software.

845

## 846 **Genotyping**

847 DNA was obtained from 57 pediatric patients with invasive pulmonary disease (IPD) and 521  
848 age- and sex-matched healthy controls from the cohort described by Garcia-Laorden and  
849 collaborators (García-Laorden et al., 2020). The genotyping was performed as previously

850 described by Barbati and collaborators (Barbati et al., 2012). Briefly, genomic DNAs  
851 extracted from frozen EDTA-whole blood were genotyped by real time-PCR, using TaqMan.  
852 In particular, 5  $\mu$ l samples containing TaqMan Genotyping Master Mix, and specific TaqMan  
853 SNP genotyping probes (rs1840680, rs2305619 and rs3816527) were mixed with 20 ng of  
854 genomic DNA and genotyped using a Quantstudio 6 Flex System according to the  
855 manufacturer's instruction (Applied Biosystems).

856

### 857 **Statistical analysis**

858 Results were expressed as median or mean  $\pm$  SEM as indicated. Statistical differences were  
859 analyzed using the non-parametric Mann-Whitney test for two groups comparison, or the non-  
860 parametric Kruskal-Wallis test with post-hoc corrected Dunn's test for multiple comparison of  
861 the mean with unequal sample size; survival analysis was performed with the logrank test  
862 with Mantel-Cox method. All the analyses were performed with GraphPad Prism 8.0; *P*  
863 values  $<0.05$  were considered significant.

864 Sample size estimation was determined for each read-out by performing pilot experiments and  
865 determining the Cohen's effect size *d* (Lakens, 2013). Sample size were then estimated using  
866 G\*Power software (version 3.1.9.7) to perform an *a priori* power analyses considering the *d*  
867 calculated as described above, an  $\alpha$  error probability of 0.05 and 0.01 and a power level (1- $\beta$   
868 error probability) of 0.8 and considering the appropriated statistical analyses test (Faul et al.,  
869 2007). Depending on the model, the sample size ranges between 3 and 40. Number of animals  
870 used are reported in the appropriate legends to figures.

871 As for SNP association analyses, these were performed using the PLINK v1.07 program  
872 (Purcell et al., 2007). All polymorphisms had a call rate of 100%, and were tested for Hardy-  
873 Weinberg equilibrium (HWE) in controls before inclusion in the analyses (*P*-HWE  $>0.05$ ). In  
874 detail, deviations from HWE were tested using the exact test (Wigginton et al., 2005)



875 implemented in the PLINK software. For each SNP, a standard case-control analysis using  
876 allelic chi-square test was used to provide asymptotic  $P$  values, odds ratio (OR), and 95%  
877 confidence interval (CI), always referring to the minor allele. Haplotype analysis and phasing  
878 was performed considering either all three SNPs together or by using the sliding-window  
879 option offered by PLINK. All  $P$  values are presented as not corrected; however, in the  
880 relevant tables, Bonferroni-corrected thresholds for significance are indicated in the footnote.  
881

## 882 **Acknowledgements**

883 The financial support of Fondazione Cariplo (Contract n° 2015-0564), the Italian Spacial  
884 Agency (ASI - MARS-PRE Project, grant number DC-VUM-2017-006), and Associazione  
885 Italiana Ricerca sul Cancro (AIRC –grant IG-2019 Contract n° 23465) are gratefully  
886 acknowledged. We also acknowledge Jean-Claude Sirard team “Bacteria Antibiotics and  
887 Immunity”, Center for Infection and Immunity of Lille, France, for providing serotype 1  
888 pneumococcal strain, and Tom van der Poll team, Academic Medical Center of Amsterdam,  
889 Netherlands, for providing us serotype 3 pneumococcal strain. CG, FA, BB and AM are  
890 supported by the European Sepsis Academy Horizon 2020 Marie Skłodowska-Curie Action:  
891 Innovative Training Network (MSCA-ESA-ITN, grant number 676129). A.R.G. received  
892 financial support from Fundação para a Ciência e a Tecnologia (FCT) for PhD grants  
893 PD/BD/114138/2016. CT received a scholarship from the Société Académique Vaudoise  
894 (Lausanne,Switzerland). The financial support of Fondazione Beppe e Nuccy Angiolini to  
895 RaPa and AI is greatly acknowledged.

896

## 897 References

- 898 Andre GO, Converso TR, Politano WR, Ferraz LFC, Ribeiro ML, Leite LCC, Darrieux  
899 M. 2017. Role of Streptococcus pneumoniae Proteins in Evasion of  
900 Complement-Mediated Immunity. *Front Microbiol* **8**.  
901 doi:10.3389/fmicb.2017.00224
- 902 Bally I, Inforzato A, Dalonneau F, Stravalaci M, Bottazzi B, Gaboriaud C, Thielens  
903 NM. 2019. Interaction of C1q With Pentraxin 3 and IgM Revisited: Mutational  
904 Studies With Recombinant C1q Variants. *Front Immunol* **10**:461.  
905 doi:10.3389/fimmu.2019.00461
- 906 Barbati E, Specchia C, Villella M, Rossi ML, Barlera S, Bottazzi B, Crociati L,  
907 d'Arienzo C, Fanelli R, Garlanda C, Gori F, Mango R, Mantovani A, Merla G,  
908 Nicolis EB, Pietri S, Presbitero P, Sudo Y, Villella A, Franzosi MG. 2012.  
909 Influence of Pentraxin 3 (PTX3) Genetic Variants on Myocardial Infarction Risk  
910 and PTX3 Plasma Levels. *PLoS ONE* **7**:e53030.  
911 doi:10.1371/journal.pone.0053030
- 912 Bilgin H, Haliloglu M, Yaman A, Ay P, Bilgili B, Arslantas MK, Ture Ozdemir F, Haklar  
913 G, Cinel I, Mulazimoglu L. 2018. Sequential Measurements of Pentraxin 3  
914 Serum Levels in Patients with Ventilator-Associated Pneumonia: A Nested  
915 Case-Control Study. *Canadian Journal of Infectious Diseases and Medical  
916 Microbiology* **2018**:1–8. doi:10.1155/2018/4074169
- 917 Bonacina F, Barbieri SS, Cutuli L, Amadio P, Doni A, Sironi M, Tartari S, Mantovani  
918 A, Bottazzi B, Garlanda C, Tremoli E, Catapano AL, Norata GD. 2016.  
919 Vascular pentraxin 3 controls arterial thrombosis by targeting collagen and  
920 fibrinogen induced platelets aggregation. *Biochimica et Biophysica Acta (BBA)  
921 - Molecular Basis of Disease* **1862**:1182–1190.  
922 doi:10.1016/j.bbadis.2016.03.007
- 923 Bonacina F, Moregola A, Porte R, Baragetti A, Bonavita E, Salatin A, Grigore L,  
924 Pellegatta F, Molgora M, Sironi M, Barbati E, Mantovani A, Bottazzi B,  
925 Catapano AL, Garlanda C, Norata GD. 2019. Pentraxin 3 deficiency protects  
926 from the metabolic inflammation associated to diet-induced obesity.  
927 *Cardiovascular Research* **115**:1861–1872. doi:10.1093/cvr/cvz068
- 928 Bottazzi B, Doni A, Garlanda C, Mantovani A. 2010. An Integrated View of Humoral  
929 Innate Immunity: Pentraxins as a Paradigm. *Annu Rev Immunol* **28**:157–183.  
930 doi:10.1146/annurev-immunol-030409-101305
- 931 Bottazzi B, Santini L, Savino S, Giuliani MM, Dueñas Díez AI, Mancuso G, Beninati  
932 C, Sironi M, Valentino S, Deban L, Garlanda C, Teti G, Pizza M, Rappuoli R,  
933 Mantovani A. 2015. Recognition of Neisseria meningitidis by the Long  
934 Pentraxin PTX3 and Its Role as an Endogenous Adjuvant. *PLoS ONE*  
935 **10**:e0120807. doi:10.1371/journal.pone.0120807
- 936 Bottazzi B, Vouret-Craviari V, Bastone A, De Gioia L, Matteucci C, Peri G, Spreafico  
937 F, Pausa M, D'Ettore C, Gianazza E, Tagliabue A, Salmona M, Tedesco F,  
938 Inrona M, Mantovani A. 1997. Multimer Formation and Ligand Recognition by  
939 the Long Pentraxin PTX3. *Journal of Biological Chemistry* **272**:32817–32823.  
940 doi:10.1074/jbc.272.52.32817
- 941 Bou Ghanem EN, Clark S, Roggensack SE, McIver SR, Alcaide P, Haydon PG,  
942 Leong JM. 2015. Extracellular Adenosine Protects against Streptococcus  
943 pneumoniae Lung Infection by Regulating Pulmonary Neutrophil Recruitment.  
944 *PLoS Pathog* **11**:e1005126. doi:10.1371/journal.ppat.1005126

- 945 Brunel A-S, Wójtowicz A, Lamoth F, Spertini O, Neofytos D, Calandra T, Marchetti O,  
946 Bochud P-Y. 2018. Pentraxin-3 polymorphisms and invasive mold infections in  
947 acute leukemia patients receiving intensive chemotherapy. *Haematologica*  
948 **103**:e527–e530. doi:10.3324/haematol.2018.195453
- 949 Campos CF, Leite L, Pereira P, Vaz CP, Branca R, Campilho F, Freitas F, Ligeiro D,  
950 Marques A, Torrado E, Silvestre R, Lacerda JF, Campos Jr. A, Cunha C,  
951 Carvalho A. 2019. PTX3 Polymorphisms Influence Cytomegalovirus  
952 Reactivation After Stem-Cell Transplantation. *Front Immunol* **10**:88.  
953 doi:10.3389/fimmu.2019.00088
- 954 Chiarini M, Sabelli C, Melotti P, Garlanda C, Savoldi G, Mazza C, Padoan R, Plebani  
955 A, Mantovani A, Notarangelo LD, Assael BM, Badolato R. 2010. PTX3 genetic  
956 variations affect the risk of *Pseudomonas aeruginosa* airway colonization in  
957 cystic fibrosis patients. *Genes Immun* **11**:665–670. doi:10.1038/gene.2010.41
- 958 Cunha C, Aversa F, Lacerda JF, Busca A, Kurzai O, Grube M, Löffler J, Maertens  
959 JA, Bell AS, Inforzato A, Barbati E, Almeida B, Santos e Sousa P, Barbui A,  
960 Potenza L, Caira M, Rodrigues F, Salvatori G, Pagano L, Luppi M, Mantovani  
961 A, Velardi A, Romani L, Carvalho A. 2014. Genetic PTX3 Deficiency and  
962 Aspergillosis in Stem-Cell Transplantation. *N Engl J Med* **370**:421–432.  
963 doi:10.1056/NEJMoa1211161
- 964 Cunha C, Monteiro AA, Oliveira-Coelho A, Kühne J, Rodrigues F, Sasaki SD, Schio  
965 SM, Camargo JJ, Mantovani A, Carvalho A, Pasqualotto AC. 2015. PTX3-  
966 Based Genetic Testing for Risk of Aspergillosis After Lung Transplant: Table  
967 1. *Clin Infect Dis* **61**:1893–1894. doi:10.1093/cid/civ679
- 968 Daigo K, Yamaguchi N, Kawamura T, Matsubara K, Jiang S, Ohashi R, Sudou Y,  
969 Kodama T, Naito M, Inoue K, Hamakubo T. 2012. The Proteomic Profile of  
970 Circulating Pentraxin 3 (PTX3) Complex in Sepsis Demonstrates the  
971 Interaction with Azurocidin 1 and Other Components of Neutrophil  
972 Extracellular Traps. *Molecular & Cellular Proteomics* **11**:M111.015073.  
973 doi:10.1074/mcp.M111.015073
- 974 de Porto AP, Liu Z, de Beer R, Florquin S, de Boer OJ, Hendriks RW, van der Poll T,  
975 de Vos AF. 2019. Btk inhibitor ibrutinib reduces inflammatory myeloid cell  
976 responses in the lung during murine pneumococcal pneumonia. *Mol Med* **25**:3.  
977 doi:10.1186/s10020-018-0069-7
- 978 Deban L, Russo RC, Sironi M, Moalli F, Scanziani M, Zambelli V, Cuccovillo I,  
979 Bastone A, Gobbi M, Valentino S, Doni A, Garlanda C, Danese S, Salvatori G,  
980 Sassano M, Evangelista V, Rossi B, Zenaro E, Constantin G, Laudanna C,  
981 Bottazzi B, Mantovani A. 2010. Regulation of leukocyte recruitment by the  
982 long pentraxin PTX3. *Nat Immunol* **11**:328–334. doi:10.1038/ni.1854
- 983 Doni A, Musso T, Morone D, Bastone A, Zambelli V, Sironi M, Castagnoli C,  
984 Cambieri I, Stravalaci M, Pasqualini F, Laface I, Valentino S, Tartari S,  
985 Ponzetta A, Maina V, Barbieri SS, Tremoli E, Catapano AL, Norata GD,  
986 Bottazzi B, Garlanda C, Mantovani A. 2015. An acidic microenvironment sets  
987 the humoral pattern recognition molecule PTX3 in a tissue repair mode  
988 **212**:21.
- 989 Faul F, Erdfelder E, Lang A-G, Buchner A. 2007. G\*Power 3: a flexible statistical  
990 power analysis program for the social, behavioral, and biomedical sciences.  
991 *Behav Res Methods* **39**:175–191. doi:10.3758/bf03193146
- 992 García-Laorden MI, Hernández-Brito E, Muñoz-Almagro C, Pavlovic-Nesic S, Rúa-  
993 Figueroa I, Briones ML, Rajas O, Borderías L, Payeras A, Lorente L, Freixinet  
994 J, Ferreres J, Obando I, González-Quevedo N, Rodríguez de Castro F, Solé-

- 995 Violán J, Rodríguez-Gallego C. 2020. Should MASP-2 Deficiency Be  
996 Considered a Primary Immunodeficiency? Relevance of the Lectin Pathway. *J*  
997 *Clin Immunol* **40**:203–210. doi:10.1007/s10875-019-00714-4
- 998 Garlanda C, Bottazzi B, Magrini E, Inforzato A, Mantovani A. 2018. PTX3, a Humoral  
999 Pattern Recognition Molecule, in Innate Immunity, Tissue Repair, and Cancer.  
1000 *Physiological Reviews* **98**:623–639. doi:10.1152/physrev.00016.2017
- 1001 Garlanda C, Hirsch E, Bozza S, Salustri A, De Acetis M, Nota R, Maccagno A, Riva  
1002 F, Bottazzi B, Peri G, Doni A, Vago L, Botto M, De Santis R, Carminati P,  
1003 Siracusa G, Altruda F, Vecchi A, Romani L, Mantovani A. 2002. Non-  
1004 redundant role of the long pentraxin PTX3 in anti-fungal innate immune  
1005 response. *Nature* **420**:182–186. doi:10.1038/nature01195
- 1006 Haapasalo K, Meri S. 2019. Regulation of the Complement System by Pentraxins.  
1007 *Front Immunol* **10**:1750. doi:10.3389/fimmu.2019.01750
- 1008 Hasenberg M, Behnsen J, Krappmann S, Brakhage A, Gunzer M. 2011. Phagocyte  
1009 responses towards *Aspergillus fumigatus*. *International Journal of Medical*  
1010 *Microbiology* **301**:436–444. doi:10.1016/j.ijmm.2011.04.012
- 1011 He Q, Li H, Rui Y, Liu L, He B, Shi Y, Su X. 2018. Pentraxin 3 Gene Polymorphisms  
1012 and Pulmonary Aspergillosis in Chronic Obstructive Pulmonary Disease  
1013 Patients. *Clinical Infectious Diseases* **66**:261–267. doi:10.1093/cid/cix749
- 1014 Hommes TJ, Hoogendijk AJ, Dessing MC, Van't Veer C, Florquin S, Colonna M, de  
1015 Vos AF, van der Poll T. 2014. Triggering receptor expressed on myeloid cells-  
1016 1 (TREM-1) improves host defence in pneumococcal pneumonia. *J Pathol*  
1017 **233**:357–367. doi:10.1002/path.4361
- 1018 Inforzato A, Riviaccio V, Morreale AP, Bastone A, Salustri A, Scarchilli L, Verdoliva  
1019 A, Vincenti S, Gallo G, Chiapparino C, Pacello L, Nucera E, Serlupi-Crescenzi  
1020 O, Day AJ, Bottazzi B, Mantovani A, De Santis R, Salvatori G. 2008. Structural  
1021 characterization of PTX3 disulfide bond network and its multimeric status in  
1022 cumulus matrix organization. *J Biol Chem* **283**:10147–10161.  
1023 doi:10.1074/jbc.M708535200
- 1024 Jaillon S, Moalli F, Ragnarsdottir B, Bonavita E, Puthia M, Riva F, Barbatì E,  
1025 Nebuloni M, Cvetko Krajinovic L, Markotic A, Valentino S, Doni A, Tartari S,  
1026 Graziani G, Montanelli A, Delneste Y, Svanborg C, Garlanda C, Mantovani A.  
1027 2014. The Humoral Pattern Recognition Molecule PTX3 Is a Key Component  
1028 of Innate Immunity against Urinary Tract Infection. *Immunity* **40**:621–632.  
1029 doi:10.1016/j.immuni.2014.02.015
- 1030 Jaillon S, Peri G, Delneste Y, Frémaux I, Doni A, Moalli F, Garlanda C, Romani L,  
1031 Gascan H, Bellocchio S, Bozza S, Cassatella MA, Jeannin P, Mantovani A.  
1032 2007. The humoral pattern recognition receptor PTX3 is stored in neutrophil  
1033 granules and localizes in extracellular traps. *Journal of Experimental Medicine*  
1034 **204**:793–804. doi:10.1084/jem.20061301
- 1035 Kao S-J, Yang H-W, Tsao S-M, Cheng C-W, Bien M-Y, Yu M-C, Bai K-J, Yang S-F,  
1036 Chien M-H. 2013. Plasma long pentraxin 3 (PTX3) concentration is a novel  
1037 marker of disease activity in patients with community-acquired pneumonia.  
1038 *Clinical Chemistry and Laboratory Medicine* **51**. doi:10.1515/cclm-2012-0459
- 1039 Kjos M, Aprianto R, Fernandes VE, Andrew PW, van Strijp JAG, Nijland R, Veening  
1040 J-W. 2015. Bright Fluorescent *Streptococcus pneumoniae* for Live-Cell  
1041 Imaging of Host-Pathogen Interactions. *J Bacteriol* **197**:807–818.  
1042 doi:10.1128/JB.02221-14
- 1043 Koh SH, Shin SG, Andrade MJ, Go R-H, Park S, Woo C-H, Lim JH. 2017. Long  
1044 pentraxin PTX3 mediates acute inflammatory responses against



- 1045 pneumococcal infection. *Biochem Biophys Res Commun* **493**:671–676.  
1046 doi:10.1016/j.bbrc.2017.08.133
- 1047 Lakens D. 2013. Calculating and reporting effect sizes to facilitate cumulative  
1048 science: a practical primer for t-tests and ANOVAs. *Front Psychol* **4**:863.  
1049 doi:10.3389/fpsyg.2013.00863
- 1050 Lech M, Römmele C, Gröbmayer R, Eka Susanti H, Kulkarni OP, Wang S, Gröne H-J,  
1051 Uhl B, Reichel C, Krombach F, Garlanda C, Mantovani A, Anders H-J. 2013.  
1052 Endogenous and exogenous pentraxin-3 limits postischemic acute and  
1053 chronic kidney injury. *Kidney International* **83**:647–661.  
1054 doi:10.1038/ki.2012.463
- 1055 Liu F, Wu HY, Wesselschmidt R, Kornaga T, Link DC. 1996. Impaired Production  
1056 and Increased Apoptosis of Neutrophils in Granulocyte Colony-Stimulating  
1057 Factor Receptor–Deficient Mice. *Immunity* **5**:491–501. doi:10.1016/S1074-  
1058 7613(00)80504-X
- 1059 Lovewell RR, Patankar YR, Berwin B. 2014. Mechanisms of phagocytosis and host  
1060 clearance of *Pseudomonas aeruginosa*. *American Journal of Physiology-Lung  
1061 Cellular and Molecular Physiology* **306**:L591–L603.  
1062 doi:10.1152/ajplung.00335.2013
- 1063 Maas SL, Soehnlein O, Viola JR. 2018. Organ-Specific Mechanisms of  
1064 Transendothelial Neutrophil Migration in the Lung, Liver, Kidney, and Aorta.  
1065 *Front Immunol* **9**:2739. doi:10.3389/fimmu.2018.02739
- 1066 Madouri F, Barada O, Kervoaze G, Trottein F, Pichavant M, Gosset P. 2018.  
1067 Production of Interleukin-20 cytokines limits bacterial clearance and lung  
1068 inflammation during infection by *Streptococcus pneumoniae*. *EBioMedicine*  
1069 **37**:417–427. doi:10.1016/j.ebiom.2018.10.031
- 1070 Mauri T, Coppadoro A, Bombino M, Bellani G, Zambelli V, Fornari C, Berra L, Bittner  
1071 EA, Schmidt U, Sironi M, Bottazzi B, Brambilla P, Mantovani A, Pesenti A.  
1072 2014. Alveolar pentraxin 3 as an early marker of microbiologically confirmed  
1073 pneumonia: a threshold-finding prospective observational study. *Crit Care*  
1074 **18**:562. doi:10.1186/s13054-014-0562-5
- 1075 Moalli F, Doni A, Deban L, Zelante T, Zagarella S, Bottazzi B, Romani L, Mantovani  
1076 A, Garlanda C. 2010. Role of complement and Fc{gamma} receptors in the  
1077 protective activity of the long pentraxin PTX3 against *Aspergillus fumigatus*.  
1078 *Blood* **116**:11. doi:10.1182/blood-2009-12-258376
- 1079 Moalli F, Paroni M, Véliz Rodriguez T, Riva F, Polentarutti N, Bottazzi B, Valentino S,  
1080 Mantero S, Nebuloni M, Mantovani A, Bragonzi A, Garlanda C. 2011. The  
1081 Therapeutic Potential of the Humoral Pattern Recognition Molecule PTX3 in  
1082 Chronic Lung Infection Caused by *Pseudomonas aeruginosa*. *Jl* **186**:5425–  
1083 5434. doi:10.4049/jimmunol.1002035
- 1084 Nathan C. 2006. Neutrophils and immunity: challenges and opportunities. *Nat Rev  
1085 Immunol* **6**:173–182. doi:10.1038/nri1785
- 1086 Olesen R, Wejse C, Velez DR, Bisseye C, Sodemann M, Aaby P, Rabna P, Worwui  
1087 A, Chapman H, Diatta M, Adegbola RA, Hill PC, Østergaard L, Williams SM,  
1088 Sirugo G. 2007. DC-SIGN (CD209), pentraxin 3 and vitamin D receptor gene  
1089 variants associate with pulmonary tuberculosis risk in West Africans. *Genes  
1090 Immun* **8**:456–467. doi:10.1038/sj.gene.6364410
- 1091 Ponzetta A, Carriero R, Carnevale S, Barbagallo M, Molgora M, Perucchini C,  
1092 Magrini E, Gianni F, Kunderfranco P, Polentarutti N, Pasqualini F, Di Marco S,  
1093 Supino D, Peano C, Cananzi F, Colombo P, Pilotti S, Alomar SY, Bonavita E,  
1094 Galdiero MR, Garlanda C, Mantovani A, Jaillon S. 2019. Neutrophils Driving

- 1095 Unconventional T Cells Mediate Resistance against Murine Sarcomas and  
1096 Selected Human Tumors. *Cell* **178**:346-360.e24.  
1097 doi:10.1016/j.cell.2019.05.047
- 1098 Porte R, Davoudian S, Asgari F, Parente R, Mantovani A, Garlanda C, Bottazzi B.  
1099 2019. The Long Pentraxin PTX3 as a Humoral Innate Immunity Functional  
1100 Player and Biomarker of Infections and Sepsis. *Front Immunol* **10**:794.  
1101 doi:10.3389/fimmu.2019.00794
- 1102 Porte R, Fougeron D, Muñoz-Wolf N, Tabareau J, Georgel A-F, Wallet F, Paget C,  
1103 Trottein F, Chabalgoity JA, Carnoy C, Sirard J-C. 2015. A Toll-Like Receptor 5  
1104 Agonist Improves the Efficacy of Antibiotics in Treatment of Primary and  
1105 Influenza Virus-Associated Pneumococcal Mouse Infections. *Antimicrob  
1106 Agents Chemother* **59**:6064–6072. doi:10.1128/AAC.01210-15
- 1107 Purcell S, Neale B, Todd-Brown K, Thomas L, Ferreira MAR, Bender D, Maller J,  
1108 Sklar P, de Bakker PIW, Daly MJ, Sham PC. 2007. PLINK: A Tool Set for  
1109 Whole-Genome Association and Population-Based Linkage Analyses. *The  
1110 American Journal of Human Genetics* **81**:559–575. doi:10.1086/519795
- 1111 Quinn MT, DeLeo FR, editors. 2020. Neutrophil: Methods and Protocols, Methods in  
1112 Molecular Biology. New York, NY: Springer US. doi:10.1007/978-1-0716-  
1113 0154-9
- 1114 Quinton LJ, Mizgerd JP. 2015. Dynamics of Lung Defense in Pneumonia:  
1115 Resistance, Resilience, and Remodeling. *Annu Rev Physiol* **77**:407–430.  
1116 doi:10.1146/annurev-physiol-021014-071937
- 1117 Saleh MAA, van de Garde EMW, van Hasselt JGC. 2019. Host-response biomarkers  
1118 for the diagnosis of bacterial respiratory tract infections. *Clinical Chemistry and  
1119 Laboratory Medicine (CCLM)* **57**:442–451. doi:10.1515/cclm-2018-0682
- 1120 Schouten M, de Boer JD, Kager LM, Roelofs JJTH, Meijers JCM, Esmon CT, Levi M,  
1121 van 't Veer C, van der Poll T. 2014. The endothelial protein C receptor impairs  
1122 the antibacterial response in murine pneumococcal pneumonia and sepsis.  
1123 *Thromb Haemost* **111**:970–980. doi:10.1160/TH13-10-0859
- 1124 Schwab S, Jobin K, Kurts C. 2017. Urinary tract infection: recent insight into the  
1125 evolutionary arms race between uropathogenic *Escherichia coli* and our  
1126 immune system. *Nephrology Dialysis Transplantation* **32**:1977–1983.  
1127 doi:10.1093/ndt/gfx022
- 1128 Sender V, Hentrich K, Pathak A, Tan Qian Ler A, Embaie BT, Lundström SL, Gaetani  
1129 M, Bergstrand J, Nakamoto R, Sham L-T, Widengren J, Normark S,  
1130 Henriques-Normark B. 2020. Capillary leakage provides nutrients and  
1131 antioxidants for rapid pneumococcal proliferation in influenza-infected lower  
1132 airways. *Proc Natl Acad Sci U S A* **117**:31386–31397.  
1133 doi:10.1073/pnas.2012265117
- 1134 Shi G-Q, Yang L, Shan L-Y, Yin L-Z, Jiang W, Tian H-T, Yang D-D. 2020.  
1135 Investigation of the clinical significance of detecting PTX3 for community-  
1136 acquired pneumonia. *European Review for Medical and Pharmacological  
1137 Sciences* **24**:8477–8482. doi:10.26355/eurrev\_202008\_22645
- 1138 Siljan WW, Holter JC, Michelsen AE, Nymo SH, Lauritzen T, Oppen K, Husebye E,  
1139 Ueland T, Mollnes TE, Aukrust P, Heggelund L. 2019. Inflammatory  
1140 biomarkers are associated with aetiology and predict outcomes in community-  
1141 acquired pneumonia: results of a 5-year follow-up cohort study. *ERJ Open  
1142 Res* **5**:00014–02019. doi:10.1183/23120541.00014-2019



- 1143 Sohail I, Ghosh S, Mukundan S, Zelewski S, Khan MN. 2018. Role of Inflammatory  
1144 Risk Factors in the Pathogenesis of Streptococcus pneumoniae. *Front*  
1145 *Immunol* **9**:2275. doi:10.3389/fimmu.2018.02275
- 1146 Stravalaci M, Pagani I, Paraboschi EM, Pedotti M, Doni A, Scavello F, Mapelli SN,  
1147 Sironi M, Perucchini C, Varani L, Matkovic M, Cavalli A, Cesana D, Gallina P,  
1148 Pedemonte N, Capurro V, Clementi N, Mancini N, Invernizzi P, Bayarri-Olmos  
1149 R, Garred P, Rappuoli R, Duga S, Bottazzi B, Uguccioni M, Asselta R, Vicenzi  
1150 E, Mantovani A, Garlanda C. 2022. Recognition and inhibition of SARS-CoV-2  
1151 by humoral innate immunity pattern recognition molecules. *Nat Immunol*  
1152 **23**:275–286. doi:10.1038/s41590-021-01114-w
- 1153 Szalai AJ. 2002. The antimicrobial activity of C-reactive protein. *Microbes and*  
1154 *Infection* **4**:201–205. doi:10.1016/S1286-4579(01)01528-3
- 1155 Tavares LP, Garcia CC, Vago JP, Queiroz-Junior CM, Galvão I, David BA, Rachid  
1156 MA, Silva PMR, Russo RC, Teixeira MM, Sousa LP. 2016. Inhibition of  
1157 Phosphodiesterase-4 during Pneumococcal Pneumonia Reduces  
1158 Inflammation and Lung Injury in Mice. *Am J Respir Cell Mol Biol* **55**:24–34.  
1159 doi:10.1165/rcmb.2015-0083OC
- 1160 Thulborn SJ, Dilpazir M, Haldar K, Mistry V, Brightling CE, Barer MR, Bafadhel M.  
1161 2017. Investigating the role of pentraxin 3 as a biomarker for bacterial infection  
1162 in subjects with COPD. *COPD* **Volume 12**:1199–1205.  
1163 doi:10.2147/COPD.S123528
- 1164 Tin Tin Htar M, Morato Martínez J, Theilacker C, Schmitt H-J, Swerdlow D. 2019.  
1165 Serotype evolution in Western Europe: perspectives on invasive  
1166 pneumococcal diseases (IPD). *Expert Review of Vaccines* **18**:1145–1155.  
1167 doi:10.1080/14760584.2019.1688149
- 1168 Troeger C, Blacker B, Khalil IA, Rao PC, Cao J, Zimsen SRM, Albertson SB,  
1169 Deshpande A, Farag T, Abebe Z, Adetifa IMO, Adhikari TB, Akibu M, Al Lami  
1170 FH, Al-Eyadhy A, Alvis-Guzman N, Amare AT, Amoako YA, Antonio CAT,  
1171 Aremu O, Asfaw ET, Asgedom SW, Atey TM, Attia EF, Avokpaho EFGA,  
1172 Ayele HT, Ayuk TB, Balakrishnan K, Barac A, Bassat Q, Behzadifar Masoud,  
1173 Behzadifar Meysam, Bhaumik S, Bhutta ZA, Bijani A, Brauer M, Brown A,  
1174 Camargos PAM, Castañeda-Orjuela CA, Colombara D, Conti S, Dadi AF,  
1175 Dandona L, Dandona R, Do HP, Dubljanin E, Edessa D, Elkout H, Endries AY,  
1176 Fijabi DO, Foreman KJ, Forouzanfar MH, Fullman N, Garcia-Basteiro AL,  
1177 Gessner BD, Gething PW, Gupta R, Gupta T, Hailu GB, Hassen HY, Hedayati  
1178 MT, Heidari M, Hibstu DT, Horita N, Ilesanmi OS, Jakovljevic MB, Jamal AA,  
1179 Kahsay A, Kasaeian A, Kassa DH, Khader YS, Khan EA, Khan MN, Khang Y-  
1180 H, Kim YJ, Kisson N, Knibbs LD, Kochhar S, Koul PA, Kumar GA, Lodha R,  
1181 Magdy Abd El Razek H, Malta DC, Mathew JL, Mengistu DT, Mezgebe HB,  
1182 Mohammad KA, Mohammed MA, Momeniha F, Murthy S, Nguyen CT, Nielsen  
1183 KR, Ningrum DNA, Nirayo YL, Oren E, Ortiz JR, Pa M, Postma MJ, Qorbani  
1184 M, Quansah R, Rai RK, Rana SM, Ranabhat CL, Ray SE, Rezai MS, Ruhago  
1185 GM, Safiri S, Salomon JA, Sartorius B, Savic M, Sawhney M, She J, Sheikh A,  
1186 Shiferaw MS, Shigematsu M, Singh JA, Somayaji R, Stanaway JD, Sufiyani  
1187 MB, Taffere GR, Temsah M-H, Thompson MJ, Tobe-Gai R, Topor-Madry R,  
1188 Tran BX, Tran TT, Tuem KB, Ukwaja KN, Vollset SE, Walson JL,  
1189 Weldegebreal F, Werdecker A, West TE, Yonemoto N, Zaki MES, Zhou L,  
1190 Zodpey S, Vos T, Naghavi M, Lim SS, Mokdad AH, Murray CJL, Hay SI,  
1191 Reiner RC. 2018. Estimates of the global, regional, and national morbidity,  
1192 mortality, and aetiologies of lower respiratory infections in 195 countries,

- 1193 1990–2016: a systematic analysis for the Global Burden of Disease Study  
1194 2016. *The Lancet Infectious Diseases* **18**:1191–1210. doi:10.1016/S1473-  
1195 3099(18)30310-4
- 1196 Weinberger DM, Harboe ZB, Sanders EAM, Ndiritu M, Klugman KP, Rückinger S,  
1197 Dagan R, Adegbola R, Cutts F, Johnson HL, O'Brien KL, Anthony Scott J,  
1198 Lipsitch M. 2010. Association of Serotype with Risk of Death Due to  
1199 Pneumococcal Pneumonia: A Meta-Analysis. *Clin Infect Dis* **51**:692–699.  
1200 doi:10.1086/655828
- 1201 Weiser JN, Ferreira DM, Paton JC. 2018. Streptococcus pneumoniae: transmission,  
1202 colonization and invasion. *Nat Rev Microbiol* **16**:355–367.  
1203 doi:10.1038/s41579-018-0001-8
- 1204 Wigginton JE, Cutler DJ, Abecasis GR. 2005. A Note on Exact Tests of Hardy-  
1205 Weinberg Equilibrium. *The American Journal of Human Genetics* **76**:887–893.  
1206 doi:10.1086/429864
- 1207 Wójtowicz A, Lecompte TD, Bibert S, Manuel O, Rüeger S, Berger C, Boggian K,  
1208 Cusini A, Garzoni C, Hirsch H, Khanna N, Mueller NJ, Meylan PR, Pascual M,  
1209 van Delden C, Bochud P-Y. 2015. *PTX3* Polymorphisms and Invasive Mold  
1210 Infections After Solid Organ Transplant: Figure 1. *Clin Infect Dis* **61**:619–622.  
1211 doi:10.1093/cid/civ386
- 1212
- 1213

1214 **Supplementary Figures**

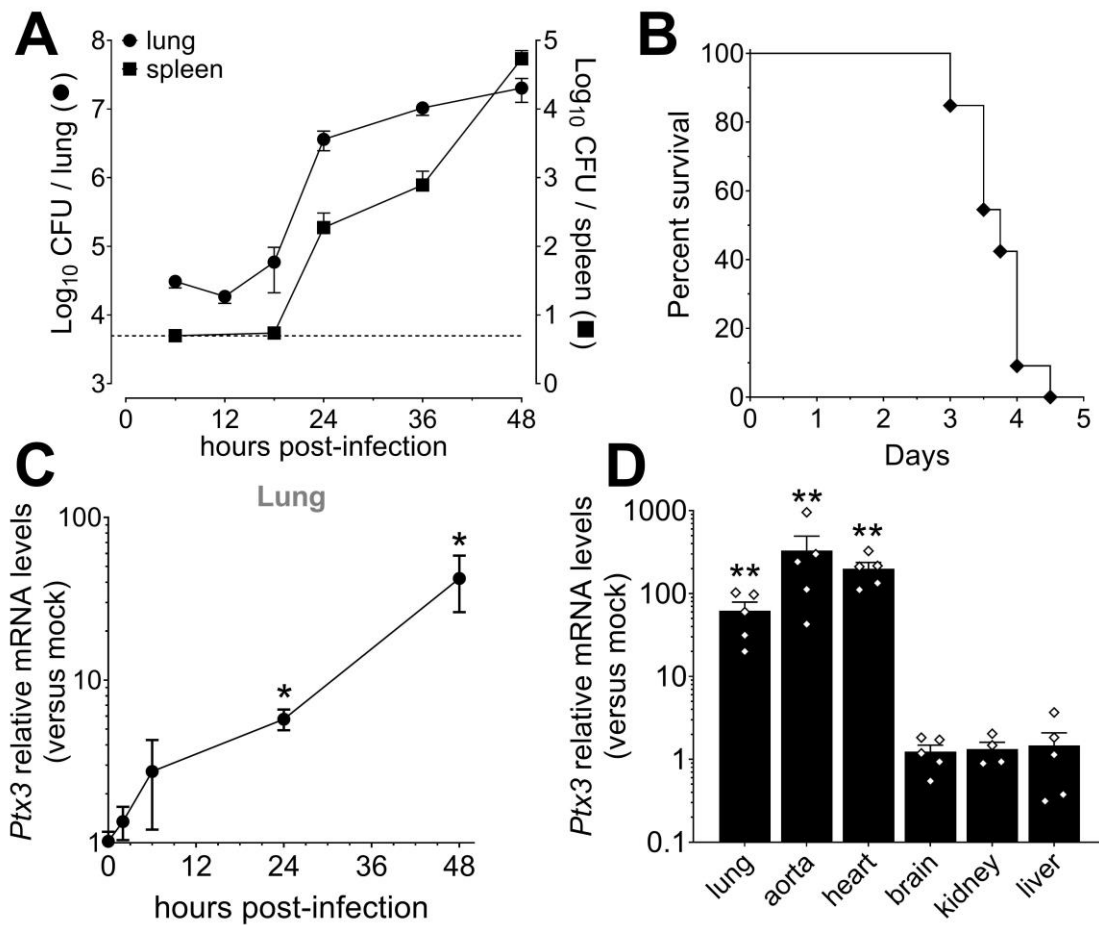

1215

1216 **Figure S1. Invasive pneumococcal infection induces PTX3 expression.**

1217 Mice were infected intranasally with  $5 \times 10^4$  CFU of *S. pneumoniae* serotype 3 and sacrificed  
1218 at the indicated time points for tissue collection. (A) Bacterial load in lung (●) and spleen (■)  
1219 collected at indicated time points after infection of WT mice (n=10-21). (B) Survival of WT  
1220 mice infected with a lethal inoculum of *S. pneumoniae* serotype 3. Mice were monitored  
1221 every 6h (n=33). (C) Relative *Ptx3* mRNA expression determined by Real-Time quantitative  
1222 PCR in lung homogenates collected at the indicated time points and normalized on uninfected  
1223 mice (n=3). (D) Relative *Ptx3* mRNA expression determined by Real-Time quantitative PCR  
1224 in the indicated organ homogenates collected 48h post-infection and compared to uninfected  
1225 mice (n=4-5). Results are reported as the mean  $\pm$  SEM. CFU detection limits in the

1226 spleen is 5 CFU represented by a dotted line. Statistical significance was determined using the  
1227 Mann-Whitney test comparing results to uninfected mice (\* $P < 0.05$  and \*\* $P < 0.01$ ).

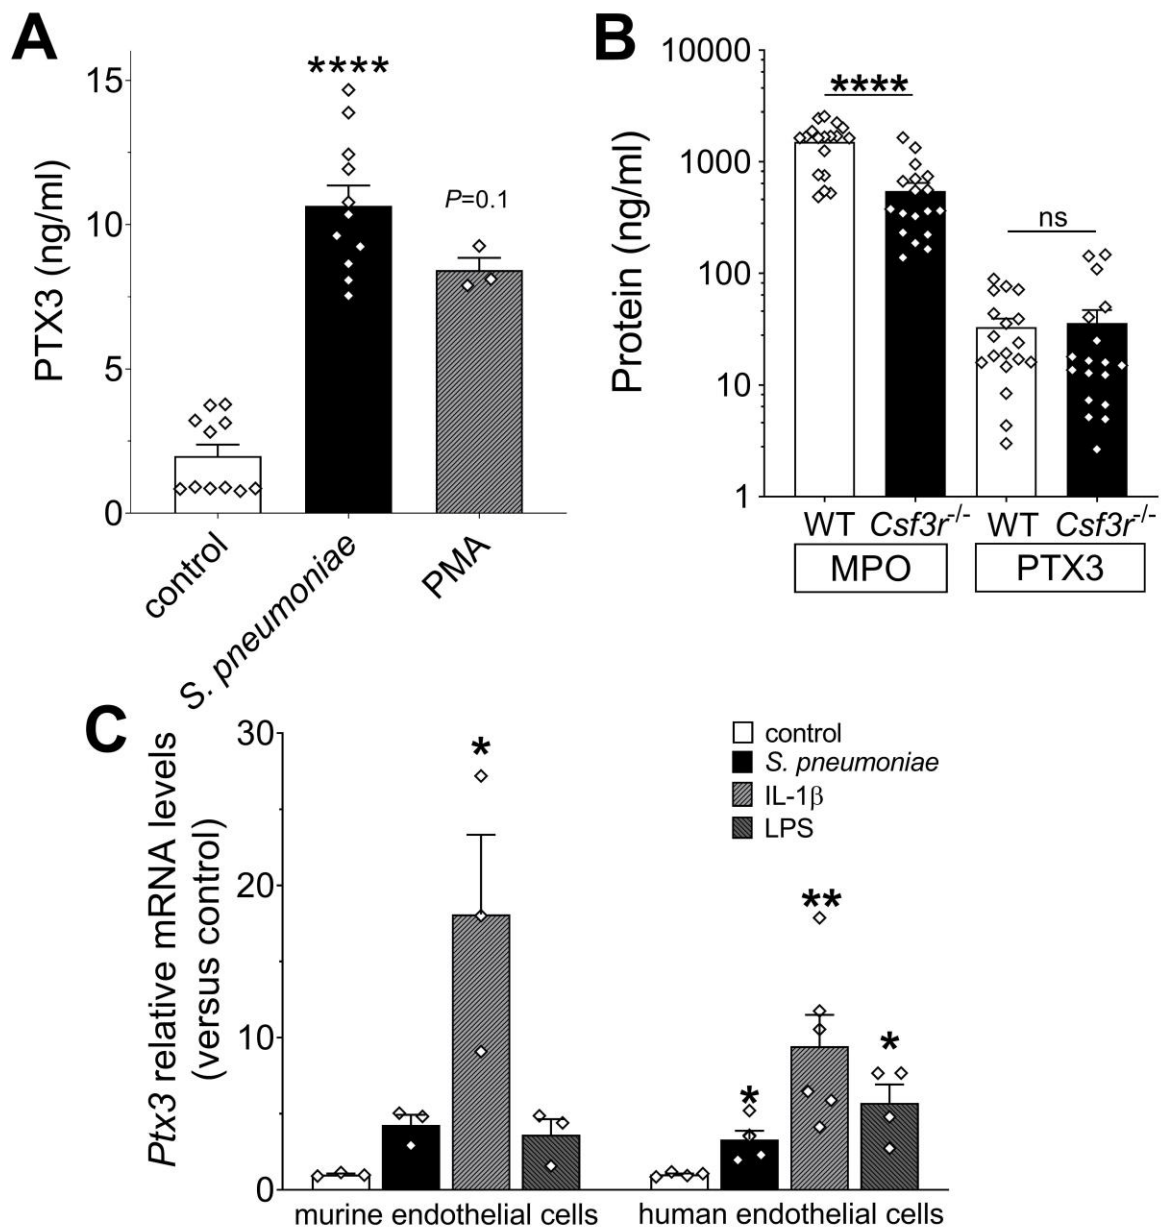

1228

1229 **Figure S2. Cellular sources of PTX3 after stimulation with *S. pneumoniae*.**

1230 (A) PTX3 protein levels, measured by ELISA, released by  $10^6$  human purified  
1231 neutrophils/100 $\mu$ l stimulated for 6h at 37 $^{\circ}$ C with  $10^7$  CFU/ml of *S. pneumoniae* serotype 3 or  
1232 10 ng/ml of phorbol myristate acetate (PMA). (B) MPO and PTX3 protein levels determined  
1233 by ELISA in lung homogenates collected 36h post intranasal infection of WT and *Csf3r*<sup>-/-</sup>

1234 mice with  $5 \times 10^4$  CFU of *S. pneumoniae* serotype 3 (data pooled from 2 experiments, n=18).  
1235 (C) Relative *Ptx3* mRNA expression determined by Real-Time quantitative PCR in human  
1236 and murine endothelial cells after 6h stimulation with  $10^6$  CFU *S. pneumoniae*, 20 ng/ml IL-  
1237  $1\beta$  or 100 ng/ml LPS (n=3-6). Results are reported as mean  $\pm$  SEM. Statistical significance  
1238 was determined using the non-parametric Kruskal-Wallis test with post-hoc corrected Dunn's  
1239 test comparing means to control group (A, C) or the Mann-Whitney test (B) (\* $P < 0.05$ ,  
1240 \*\* $P < 0.01$  and \*\*\*\* $P < 0.0001$ ).

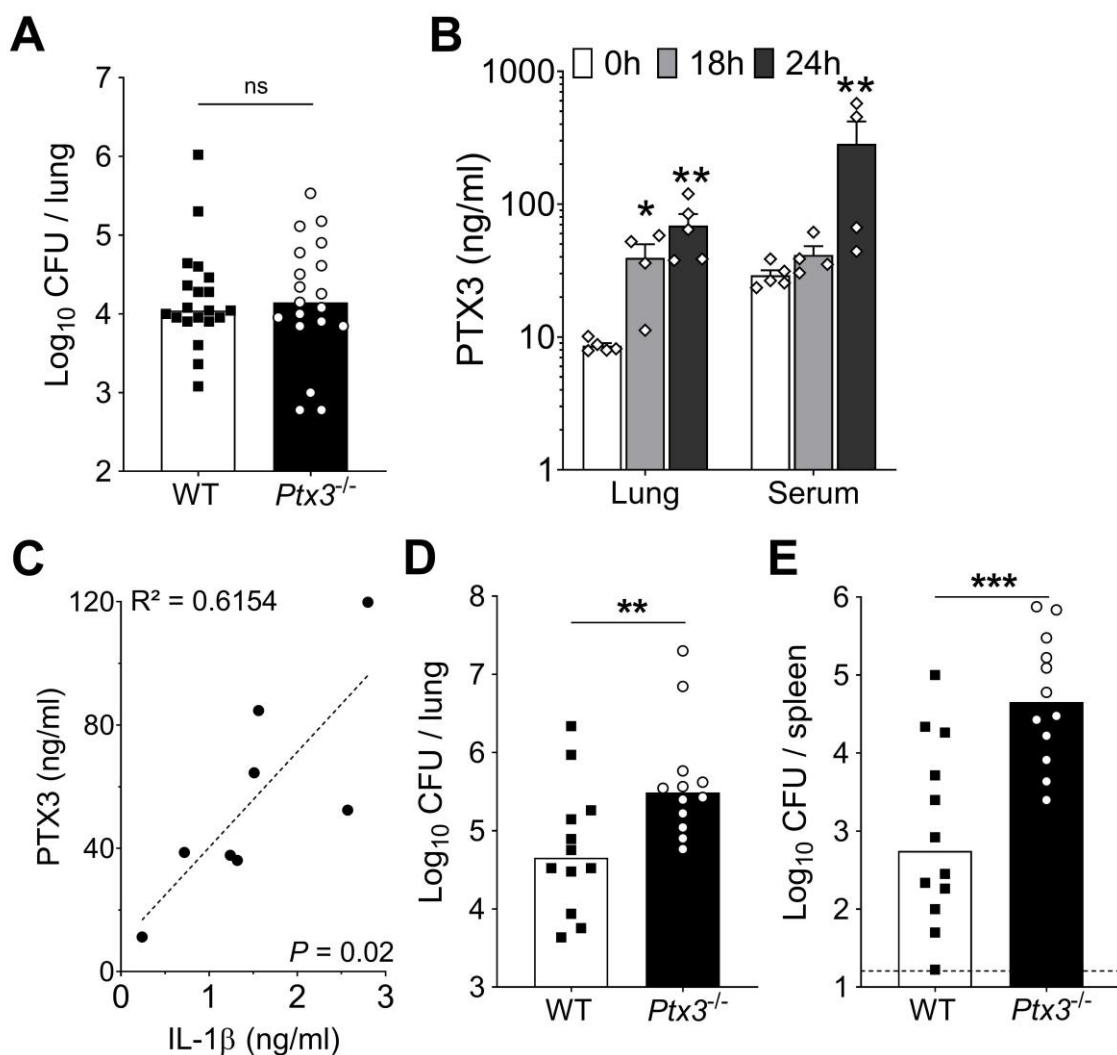

1241  
1242 **Figure S3. Infection with *S. pneumoniae* serotype 1 and bacterial growth rate in the**  
1243 **presence of PTX3.**

1244 Mice were infected intranasally with  $5 \times 10^4$  CFU of *S. pneumoniae* serotype 3 (A) or with  $10^6$   
1245 CFU of *S. pneumoniae* serotype 1 (B-E) and sacrificed at the indicated time points for tissue  
1246 collection. (A) WT and *Ptx3*<sup>-/-</sup> mice were infected with  $5 \times 10^4$  CFU and bacterial load in lung  
1247 was analyzed at 18h post-infection (data pooled from 2 independent experiments, n=19-20).  
1248 (B) PTX3 protein levels determined by ELISA in lung homogenates and serum collected at  
1249 the indicated time points (n=4-5). (C) Correlation between PTX3 and IL-1 $\beta$  protein levels in  
1250 lung homogenates of all infected mice sacrificed from 18 to 24 hours post-infection (n=8). (C-  
1251 D) Bacterial load in lung (D) and spleen (E) collected at the indicated time points after  
1252 infection of WT and *Ptx3*<sup>-/-</sup> mice with *S. pneumoniae* serotype 1 (n=12). Results are reported  
1253 as the mean  $\pm$  SEM (B). CFU detection limits in the spleen is 5 CFU represented by a dotted  
1254 line. Statistical significance was determined using the non-parametric Kruskal-Wallis test with  
1255 post-hoc corrected Dunn's test comparing means to uninfected mice (B) and the Mann-  
1256 Whitney test (A, D-E) (\* $P < 0.05$ , \*\* $P < 0.01$  and \*\*\* $P < 0.001$ ).

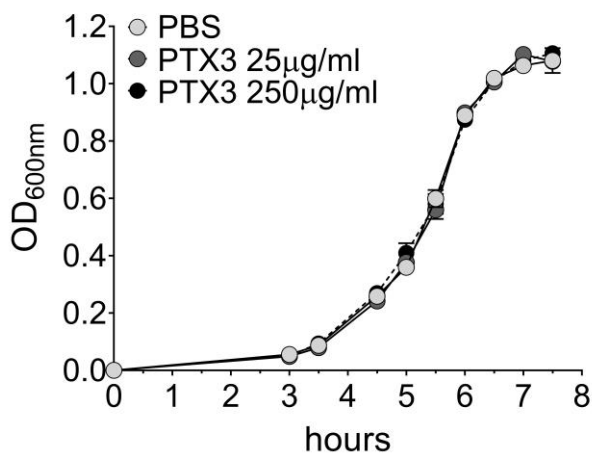

1257

1258 **Figure S4. Lack of effect of PTX3 on *S. pneumoniae* growth rate.**

1259 Growth rate of *S. pneumoniae* serotype 3 non-opsonized or pre-opsonized with recombinant  
1260 PTX3 (25-250 µg/ml for 40 min) was measured in the culture condition reported in the  
1261 Material & Methods section. Absorbance (600 nm) was measured at the indicated time points  
1262 (n=3) and is reported as mean  $\pm$  SEM.



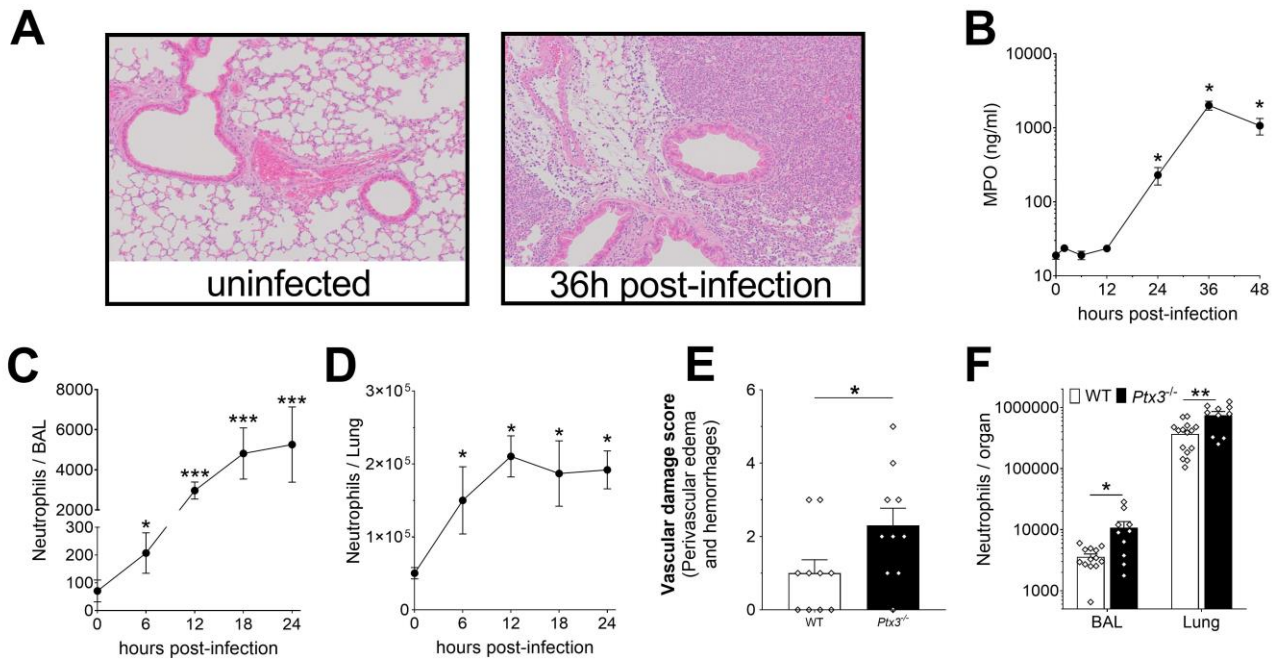

1263

1264 **Figure S5. Neutrophil recruitment during invasive pneumococcus infection.**

1265 Mice were infected intranasally with  $5 \times 10^4$  CFU of *S. pneumoniae* serotype 3 (A-E) or with  
 1266  $10^6$  CFU of serotype 1 (F) and sacrificed at the indicated time points for tissue collection. (A)  
 1267 Hematoxylin and Eosin (H&E) staining of formalin-fixed lung sections from WT mice  
 1268 uninfected and 36h after infection at 10x magnification. (B) MPO levels determined by  
 1269 ELISA in lung homogenates collected at the indicated time points (n=4). (C-D) Neutrophil  
 1270 number determined by flow cytometry in the BAL (C) and lung (D) collected at the indicated  
 1271 time points from WT mice (n=4-8). (E) Vascular damage histological score measured in lungs  
 1272 collected 18h post-infection from WT and *Ptx3<sup>-/-</sup>* mice. Scores (detailed in the Material and  
 1273 Methods section) were determined on three H&E stained lung sections per mice at different  
 1274 depth separated by at least 100 $\mu$ m each (n=6-10). (F) Neutrophil number determined by flow  
 1275 cytometry in the BAL and lung collected 18h post-infection from WT and *Ptx3<sup>-/-</sup>* mice (data  
 1276 pooled from 2 independent experiments, n=10-13). Results are reported as mean  $\pm$  SEM.  
 1277 Statistical significance was determined using the Mann-Whitney test comparing results to  
 1278 uninfected mice (\* $P$ <0.05, \*\* $P$ <0.01 and \*\*\* $P$ <0.001).



1279

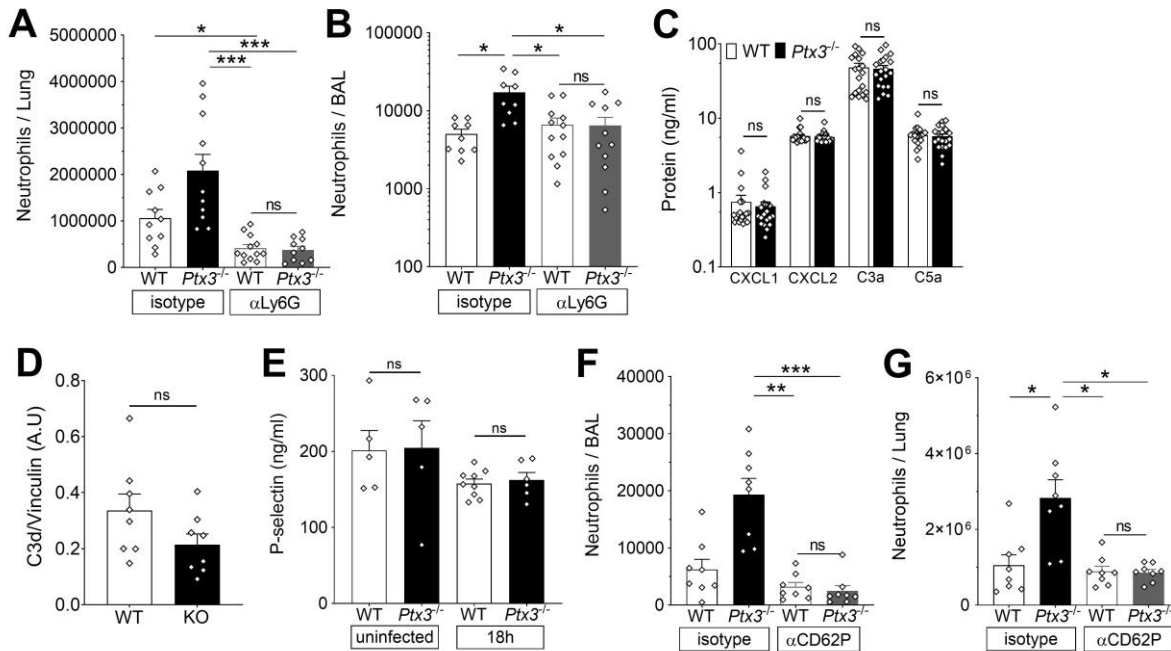

1280

1281 **Figure S6. PTX3 modulates neutrophil recruitment.**

1282 Mice were infected intranasally with  $5 \times 10^4$  CFU of *S. pneumoniae* serotype 3 and sacrificed  
 1283 at the indicated time points for tissue collection. (A-B) Neutrophil number determined by  
 1284 flow cytometry in the lung (A) and BAL (B) collected 18h post-infection from WT and  $Ptx3^{-/-}$   
 1285 mice treated intraperitoneally 12h post-infection with 200 $\mu$ g/100 $\mu$ l of anti-Ly6G or isotype  
 1286 control antibodies (data pooled from 2 independent experiments, n=9-12). (C) Chemokines  
 1287 (CXCL1/CXCL2) and anaphylatoxins (C3a/C5a) levels measured by ELISA in lung  
 1288 homogenates collected 18h post-infection from WT and  $Ptx3^{-/-}$  mice (data pooled from 2  
 1289 independent experiments, n=20). (D) C3d level in lung homogenates collected 36h post-  
 1290 infection from WT and  $Ptx3^{-/-}$  (KO) mice, detected by western blot and normalized with  
 1291 vinculin expression (n=8). (E) P-selectin expression in lung at steady state or during  
 1292 *S. pneumoniae* respiratory infection. WT and  $Ptx3^{-/-}$  mice were infected intranasally with  
 1293  $5 \times 10^4$  CFU of *S. pneumoniae* serotype 3 and sacrificed 18h post-infection for lung tissue  
 1294 collection. Uninfected mice were also collected for steady state expression. P-selectin

1295 expression was evaluated in lung homogenates by ELISA (n=5-9). (F-G) Neutrophil number  
1296 determined by flow cytometry in the BAL (F) and lung (G) collected 18h post-infection from  
1297 WT and *Ptx3*<sup>-/-</sup> mice treated intraperitoneally 12h post-infection with 50µg/100µl of anti-  
1298 CD62P or isotype control antibodies (n=8). Results are reported as mean ± SEM. Statistical  
1299 significance was determined using the non-parametric Kruskal-Wallis test with post-hoc  
1300 corrected Dunn's test comparing means to WT mice treated with isotype antibody (A-B, E-G)  
1301 and the Mann-Whitney test (C) (\**P*<0.05, \*\**P*<0.01 and \*\*\**P*<0.001).

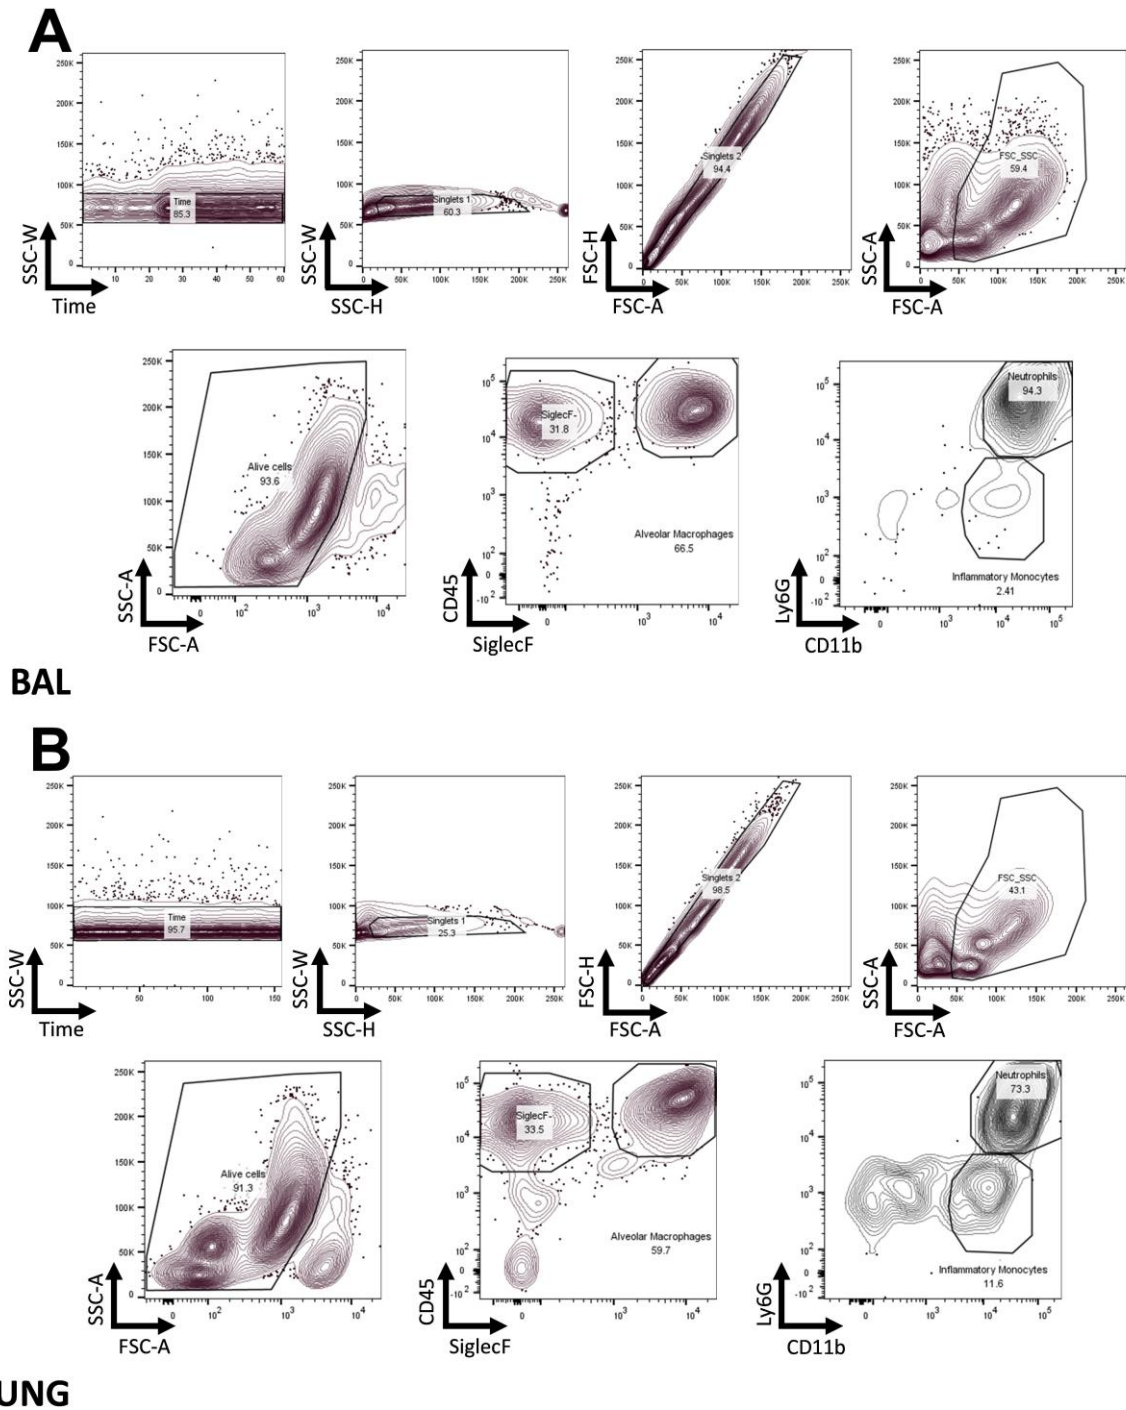

1302

1303 **Figure S7. FACS gating strategy.**

1304 **Identification of myeloid subset in the BAL and in the lung reported in the Material &**  
1305 **Methods section.**

1306
